# Supplementary material
Source: publisher figshare collection journal article supplement (https://springernature.figshare.com/ndownloader/files/13477640)
Supplement: Supplementary file 1 [file 13477640]

## Sheet: Sheet1
Taxonomic Group	Authority	Total specimens	# of stations	Min depth (m)	Max depth (m)	Undescribed	Known from Australia	Known from GAB	Temperate Australia
PORIFERA
DEMOSPONGIAE
Ancorinidae
Ancorinidae sp. 1			1	409.85	409.85
Asteropus sp. 1		2	1	198.85	198.85
Psammastra sp.			1	409.85	409.85
Stelletta sp. 1			1	388.1	388.1
Stelletta sp. 2		49	4	189.15	425.65
Stelletta sp. 3		17	2	382.6	409.85
Stelletta sp. 4			1	189.15	189.15
Stryphnus sp.			1	189.15	189.15
Aplysinellidae
Suberea sp. 1		1	1	283.2	283.2
Aplysinidae
Aplysina sp. 1			1	208.7	208.7
Axinellidae
Auletta sp.			1	409.85	409.85
Axinella sp. 1			2	388.1	409.85
Axinella sp. 2			1	388.1	388.1
Axinella sp. 3			2	388.1	409.85
Axinella sp. 4			1	221.35	221.35
Axinella sp. 5			1	189.15	189.15
Axinella sp. 6			1	409.85	409.85
Axinella sp. 7			1	217.5	217.5
Axinella sp. 8		2	2	198.85	221.35
Axinellidae sp. 1			1	221.35	221.35
Axinellidae sp. 2			1	221.35	221.35
Axinellidae sp. 3			2	388.1	409.85
Cymbastela? sp. 1			1	208.7	208.7
Pararhaphoxya sp. 1			2	382.6	388.1
Pararhaphoxya sp. 2		2	1	283.2	283.2
Phakellia sp. 1			1	208.7	208.7
Phakellia sp. 2			1	409.85	409.85
Phakellia sp. 3			1	409.85	409.85
Callyspongiidae
Callyspongia (Callyspongia) sp. 1		48	6	189.15	283.2		Y	Y	Y
Callyspongia (Callyspongia) sp. 2			1	208.7	208.7
Callyspongia sp. 3		7	5	189.15	283.2
Callyspongia sp. 4			1	208.7	208.7
Chalinidae
Chalinula sp. 1		1	3	189.15	221.35
Haliclona (Haliclona) sp. 1			1	208.7	208.7
Haliclona (Haliclona) sp. 2		1	1	283.2	283.2
Chondropsidae
Chondropsis sp. 1			2	208.7	217.5
Chondropsis sp. 2			1	208.7	208.7
Chondropsis sp. 3		1	2	221.35	283.2
Phoriospongia sp. 1			1	388.1	388.1
Cladorhizidae
Cladorhiza sp. 1		3	3	3007.91	3048.42
Abyssocladia n sp (oxyasters)		2	1	3062.72	3062.72
Asbestopluma (Helophloeina) sp. 1		3	1	1393	1393	Y
Coelosphaeridae
Histodermella australis	Dendy, 1924	2	3	137	137
Coelosphaera (Coelosphaera) sp. 1			1	388.1	388.1
Forcepia (Forcepia) sp. 1			1	388.1	388.1
Lissodendoryx (Anomodoryx) cf. dendyi	(Whitelegge, 1901)		1	409.85	409.85
Lissodendoryx (Lissodendoryx) sp. 2		30	3	388.1	425.65
Crellidae
Crella sp.			1	409.85	409.85
Darwinellidae
Darwinellidae sp.			1	382.6	382.6
Darwinellidae/Suberitidae
Darwinellidae/Suberitidae sp. 1			2	388.1	409.85
Dendoricellidae
Dendoricellidae sp.			1	283.2	283.2
Fibulia sp. 1			1	208.7	208.7
Dictyodendrillidae
Dictyodendrilla sp. 1			1	388.1	388.1
Dictyonellidae
Acanthella sp. 1			3	208.7	2839.5
Stylissa carteri	(Dendy, 1889)		1	208.7	208.7
Dysideidae
cf. Euryspongia sp. 1		1	1	283.2	283.2
cf. Euryspongia sp. 2			2	189.15	221.35
Halichondriidae
Ciocalypta sp. 1			1	283.2	283.2
Ciocalypta sp. 2		5	6	137	217.5
Halichondria sp. 2		3	3	141	141
Halichondria sp.		2	2	382.6	409.85
Halichondriidae sp. 1			1	221.35	221.35
Halichondriidae sp. 2			1	221.35	221.35
Irciniidae
Irciniidae sp.			1	425.65	425.65
Psammocinia sp. 1			2	189.15	283.2
Latrunculliidae
Latrunculia sp. 1		1	1	2756	2756
Microcionidae
Clathria (Microciona) sp. 1		1	1	1375	1375
Clathria sp.			1	217.5	217.5
Mycalidae
Mycale (Mycale) sp. 1		30	3	382.6	425.65
Myxillidae
Myxilla sp. 1		1	1	382.6	382.6
Niphatidae
Amphimedon sp. 1			1	409.85	409.85
Hemigellius sp. 1		2	2	221.35	1363.6	Y
Niphates sp. 1			1	208.7	208.7
Niphates sp. 2			2	189.15	217.5
Niphates sp. 3			1	221.35	221.35
Niphatidae sp. 1			2	189.15	208.7
Niphatidae sp. 2			1	189.15	189.15
Niphatidae sp. 3			1	198.85	198.85
Niphatidae sp. 4			1	198.85	198.85
Pachastrellidae
Pachastrellidae sp. 1		9	2	4606.8	4684
Petrosiidae
Neopetrosia sp. 1			2	208.7	221.35
Neopetrosia sp. 2			1	189.15	189.15
Phloeodictyidae
Oceanapia sp.			1	221.35	221.35
Oceanapia sp. 1			1	221.35	221.35
Oceanapia sp. 10			2	189.15	221.35
Oceanapia sp. 11			1	221.35	221.35
Oceanapia sp. 12			1	283.2	283.2
Oceanapia sp. 13			1	189.15	189.15
Oceanapia sp. 2			1	221.35	221.35
Oceanapia sp. 3		6	2	221.35	283.2		Y	Y	Y
Oceanapia sp. 4			2	221.35	283.2
Oceanapia sp. 5		3	2	221.35	283.2
Oceanapia sp. 6			1	221.35	221.35
Oceanapia sp. 7		1	3	198.85	283.2
Oceanapia sp. 8		2	1	283.2	283.2
Oceanapia sp. 9		1	1	221.35	221.35
Phloeodictyidae sp.			1	221.35	221.35
Polymastiidae
Polymastia sp. 1		7	5	137	198.85
Raspailiidae
Aulospongus sp.			1	409.85	409.85		Y
Raspailia (Clathriodendron) sp. 1			2	388.1	409.85
Raspailia (Parasyringella) sp. 1			1	388.1	388.1
Raspailia (Parasyringella) sp. 2			1	221.35	221.35
Raspailia (Raspailia) sp. 1			1	388.1	388.1
Raspailia (Raspailia) sp. 2			2	198.85	217.5
Raspailia (Raspailia) sp. 3			1	388.1	388.1
Raspailia (Raspaxilla) sp. 1		35	5	189.15	388.1
Spongiidae
Hyattella sp. 1			1	221.35	221.35
Leiosella sp. 1			1	221.35	221.35
Leiosella sp. 2			5	189.15	409.85
Leiosella sp. 3		1	2	283.2	382.6
Leiosella sp. 4			2	189.15	198.85
Spongia sp. 1			1	217.5	217.5
Spongia sp. 2			1	189.15	189.15
Spongia sp. 3			2	198.85	217.5
Spongiidae sp. 1			1	208.7	208.7
Spongiidae sp. 2			1	409.85	409.85
Spongiidae sp. 3			1	388.1	388.1
Spongiidae sp. 4			1	221.35	221.35
Stylocordylidae
Stylocordyla sp. 1		11	4	189.15	425.65
Suberitidae
Pseudosuberites sp. 1			1	221.35	221.35
Pseudosuberites sp. 2			1	208.7	208.7
Rhizaxinella sp. 1		33	9	137	1552.65
Suberites sp. 1		13	11	382.6	4012.65
Suberites sp. 2			1	388.1	388.1
Suberites sp. 3			1	388.1	388.1
Suberites sp. 4			1	409.85	409.85
Suberites sp. 5			1	409.85	409.85
Tethyidae
Tethya sp. 1		16	1	198.85	198.85
Tethycometes sp. 1		5	3	217.5	411.7
Tethyidae sp.1		48	6	986.6	1026.65
Tetillidae
Tetillidae sp. 1			1	388.1	388.1	Y
Theneidae
Thenea sp. 1		10449	26	411.7	3793.5
Theonellidae
Theonellidae sp. 1			1	388.1	388.1
Thorectidae
Aplysinopsis sp. 1		5	2	198.85	221.35
Fascaplysinopsis sp. 1		2	2	189.15	198.85
Hyrtios sp.		4	1	198.85	198.85
Hyrtios sp. 1		2	2	198.85	208.7
Hyrtios sp. 2			1	217.5	217.5
Hyrtios sp. 3			1	189.15	189.15
Thorecta sp. 1			1	189.15	189.15
Thorectandra sp. 2			1	382.6	382.6
Trachycladidae
Trachycladus sp.			1	409.85	409.85
CALCAREA
Amphoriscidae
Leucilla sp.			1	283.2	283.2
cf. Jenkinidae
cf. Jenkinidae sp. 1		1	2	198.85	221.35
Clathrinidae
Arthuria sp.			1	208.7	208.7
Clathrina sp.			1	283.2	283.2
Clathrinidae sp. 1		7	1	283.2	283.2
Clathrinidae sp. 2		2	2	189.15	198.85
Clathrinidae sp. 3		3	1	283.2	283.2
Clathrinidae sp. 4			1	189.15	189.15
Ernstia n. sp. 1			1	208.7	208.7	Y
Grantiidae
Aphroceras sp. 1			1	221.35	221.35
Grantiidae sp.		28	6	189.15	283.2
Leucandra sp.			1	189.15	189.15
Ute cf. syconoides	(Carter, 1886)	3	5	189.15	283.2
Ute n. sp. 1			1	221.35	221.35	Y
Heteropiidae
Grantessa sp. 1		1	4	189.15	221.35
Sycettusa cf. tenuis	Borojevic & Klautau, 2000		4	189.15	217.5
Lelapiidae
Lelapia australis	Gray, 1867		2	189.15	198.85
Leucaltidae
Leucettusa lancifera	Dendy, 1924	15	7	189.15	1020.9
Leucettusa n. sp. 1		20	6	189.15	283.2	Y
Leucascidae
Ascaltis sp. 1			1	217.5	217.5
Ascaltis sp. 2			1	198.85	198.85
Ascaltis sp. 3		2	2	198.85	217.5
Ascoleucetta compressa	Dendy & Frederick, 1924		4	189.15	283.2
Ascoleucetta n. sp. 1		7	4	189.15	283.2	Y
Ascoleucetta n. sp. 2			1	189.15	189.15	Y
Ascoleucetta n. sp. 3		1	1	283.2	283.2	Y
Ascoleucetta n. sp. 4		8	2	217.5	283.2	Y
Ascoleucetta sp.		4	5	189.15	283.2
Leucettidae
Leucetta sp. 1			1	221.35	221.35
Leucetta sp. 2		1	4	189.15	283.2
Leucosoleniidae
Leucosoleniidae sp. 1			2	189.15	208.7
Leucosoleniidae sp. 2			1	198.85	198.85
Sycettidae
Sycon sp. 1		3	2	189.15	198.85
Sycon sp. 2			1	189.15	189.15
HEXACTINELLIDA
cf. Hyalonematidae
cf. Hyalonematidae sp.		1	1	1020.9	1020.9
Aulocalycidae
Aulocalycidae sp. 1		1	1	4090	4090
Euplectellidae
Docosaccus sp. 1		1	1	2064.14	2064.14	Y
Euplectellidae sp. 1		5	2	1402.35	1779.1
Euplectellidae sp. 2			1	986.6	986.6
Euplectellidae sp. 3			1	1020.9	1020.9
Euplectellidae sp. 4		1	1	3883.5	3883.5
Walteria flemmingi	Schulze, 1886	11	5	986.6	1027.2		Y	Y	Y
Farreidae
Farrea cf. occa	Bowerbank, 1862	2	2	1380.81	2781.26
Hyalonematidae
Hyalonema (Leptonema) sp. 1		4	4	1026.65	2725.55
Hyalonema (Leptonema) sp. 2		1	1	3464.5	3464.5
Hyalonema (Leptonema) sp. 3		1	1	2058.44	2058.44
Hyalonema (Coscinonema) sp. 1		2	1	3793.5	3793.5
Hyalonema (Phialonemiella) sp. 1		1	1	3292.5	3292.5
Hyalonema (Oonema) sp. 1		1	1	2057.55	2057.55	Y
Hyalonema (Oonema) sp. 2		1	1	1843	1843
Hyalonema (Coryonema) sp. 1		1	1	2055.5	2055.5
Hyalonema (Coryonema) sp. 2		1	1	3464.5	3464.5
Hyalonema sp. 2		1	1	1021.4	1021.4
Hyalonema sp. 3			1	1020.9	1020.9
Hyalonema sp. 4			1	1020.9	1020.9
Hyalonema sp. 5		2	1	2014	2014
Hyalonema sp. 6			1	2037.2	2037.2
Hyalonematidae sp. 1		2	2	995.55	1020.9
Hyalonematidae sp. 2			1	2724.9	2724.9
Hyalonematidae sp. 3		1	1	1492.15	1492.15
Hyalonematidae sp. 4		2	1	2014	2014
Hyalonematidae sp. 5		2	1	3292.5	3292.5
Leucopsacidae
Leucopsacidae sp. 1		1	1	1478.05	1478.05
Pheronematidae
Pheronematidae sp. 1		1	1	1790	1790
Rossellidae
Aphorme sp. 1		4	1	1020.9	1020.9
Bathydorus sp. 1		1	1	1338	1338	Y
Caulophacus sp. 1		1	1	2846	2846	Y	Y
Crateromorpha sp. 1		1	1	3035.8	3035.8	Y
Rossellidae sp. 1		4	1	1862.95	1862.95
Rossellidae sp. 2			1	986.6	986.6
Rossellidae sp. 3		7	1	986.6	986.6
Rossellidae sp. 4			1	1020.9	1020.9
Rossellidae sp. 5		1	1	1020.9	1020.9
Rossellidae sp. 6		1	1	1020.9	1020.9
Rossellidae sp. 7		2	1	4090	4090
Rossellidae sp. 8		1	1	4961	4961
Unknown Family
Hexactinellida sp.		1	1	3927	3927
Hexactinellida sp. 1		1	1	3062.72	3062.72
Hexactinellida sp. 2		1	1
Hexactinosid sp. 1		34	6	1699.05	3734.55
Hexactinosid sp. 2		3	2	1779.1	2507.71
Hexactinosid sp. 3			1	986.6	986.6
Lyssacinosida sp. 1		3	1	1526.6	1526.6
CNIDARIA
SIPHONOPHORAE
Rhodaliidae
Dendrogramma enigmatica	Just, Kristensen & Olesen, 2014	120	7	986.6	2725.55		Y		Y
ANTIPATHARIA
Antipathidae
Stichopathes cf. paucispina	(Brook, 1889)	1	1	1385	1385
Cladopathidae
Heteropathes cf. americana	(Opresko, 2003)	2	2	2507.22	2510.2
Leiopathidae
Leiopathes acanthophora	Opresko, 1998	1	1	1365	1365		Y		Y
Leiopathes cf. acanthophora		1	1	1375	1375
Schizopathidae
Bathypathes sp.		3	3	1363.6	3464.5	Y
Bathypathes sp. 1		1	1	1364	1364
Bathypathes cf. tenuis	Brook, 1899	4	1	4961	4961		Y	Y	Y
Parantipathes helicosticha	Opresko, 1999	2	2	1375	1393		Y	Y	Y
Stauropathes sp.		1	1	2507.71	2507.71
ALCYONACEA
Acanthogorgiidae
Acanthogorgia sp.		1	1	986.6	986.6		Y	Y	Y
Alcyoniidae
Anthomastus n. sp. Q [NIWA TAN0803, 2014]		1	1	986.6	986.6	Y	Y
Anthomastus sp. R [2017]		1	1	2825.55	2825.55
Anthomastus sp. S		1	1	1370	1370	Y
Eleutherobia n. sp. C [2017]		1	2	189.15	198.85
Pseudoanthomastus n. sp. O		1	1	4090	4090	Y
Anthothelidae
Solenocaulon n. sp. B [2017]			5	189.15	1552.65	Y
Trachythela n. sp. A		1	1	986.6	986.6	Y
Victorgorgia n. sp. B		8	2	1699.05	1734.85	Y
Chrysogorgiidae
Chrysogorgia sp.		3	1	1767.3	1767.3		Y	Y	Y
Radicipes sp. D		4	1	2114.2	2114.2	Y
Chrysogorgia sp.		1	1	1371	1371
Iridogorgia sp.		1	1	2135.2	2135.2
Clavulariidae
Clavulariidae n. gen. D n. sp. C [NIWA TAN0803, 2014]		2	2	986.6	1526.6	Y
Clavulariidae n. gen. H n. sp. A		8	3	1701.35	2150.45	Y
Clavulariidae n. gen. I n. sp. A		2	1	1393	1393	Y
Coralliidae
Hemicorallium n. sp. A		1	1	1699.05	1699.05	Y
Isididae
Acanella sp. A [SS200702, 2008]		5	3	986.6	1026.65	Y	Y		Y
Bathygorgia n. sp. B		1	1	3883.5	3883.5	Y
Bathygorgia n. sp. C		1	1	4961	4961	Y
Bathygorgia n. sp. D		1	1	2502.97	2502.97	Y
Eknomisis n. sp. A			1	989.6	989.6
Isidella n. sp. H		5	5	2135.2	2781.26	Y
Isidella sp.		1	1	2502.34	2502.34
Jasonisis thresheri	Alderslade & McFadden, 2012	3	3	2124.75	2499.4		Y		Y
Jasonisis n. sp. A		5	2	2503.4	2507	Y
Keratoisis paucispina	Wright & studer, 1889	5	5	2047.19	2059
Keratoisis cf. paucispina		1	1	2047.5	2047.5
Keratoisis sp. D		1	1	4090	4090	Y	Y		Y
Lepidisis n. sp. U		3	2	3793.5	3883.5	Y
Lepidisis n. sp. V		2	2	3464.5	4090	Y
Lepidisis n. sp. W		2	2	1814.57	1814.58	Y
Lepidisis sp.		2	1	2014	2014
Isididae sp.		2	2	1790	2757
Nephtheidae
Dendronephthya cf. waitei	Thomson & Mackinnon, 1911	1	1	283.2	283.2		Y	Y	Y
Drifa portlandensis	(Verseveldt, 1977)	10	1	198.85	198.85		Y	Y	Y
Scleronephthya sp. D [2017]		6	1	208.7	208.7
Paragorgiidae
Paragorgia n. sp. E		1	1	1701.35	1701.35	Y
Plexauridae
Plexauridae n. gen. E n. sp. B [2017]			1	221.35	221.35	Y
Swiftia n. sp. C [2017]			1	995.55	995.55	Y
Primnoidae
Callogorgia flabellum	(Ehrenberg, 1834)	5	3	986.6	1862.95		Y	Y	Y
Callogorgia n. sp. B [2017]			1	995.55	995.55	Y
Callogorgia n. sp. C		1	1	1657.17	1657.17	Y
Calyptrophora cf. antilla	Bayer, 2001	7	4	1651.9	2014
Narella sp. H		6	1	986.6	986.6
Paranarella n. sp. A		1	1	4090	4090	Y
Parastenella n. sp. C		2	2	986.6	1699.05	Y
Pseudoplumarella australis	(Briggs, 1915)		1	208.7	208.7		Y	Y	Y
Unknown Family
Alcyonacea sp. 1		1	1	1350	1350
PENNATULACEA
Anthoptilidae
Anthoptilum cf. kuekenthali		2	1	2003.9	2003.9		Y		Y
Anthoptilum grandiflorum	(Verrill, 1879)	5	4	986.6	1020.9		Y
Anthoptilum murrayi	Kölliker, 1880	3	3	1020.9	1335.4
Funiculinidae
Funiculina n. sp. B [2017]		2	2	2003.9	2934.5	Y
Funiculina n. sp. C		2	2	1843	2051.11	Y
Kophobelemnidae
Kophobelemnon n. sp. A		2	3	2048.22	2259.98	Y
Sclerobelemnon burgeri	(Herklots, 1858)	27	3	189.15	217.5
Pennatulidae
Pennatula cf. inflata	Kükenthal, 1910	1	2	995.55	1492.15
Pennatula indica	Thomson & Henderson, 1906	1	1	1168.85	1168.85		Y
Pennatula sp. F [2017]		2	2	1004.65	1478.05
Pennatula n. sp. G		1	1	1375.07	1375.07	Y
Pennatula sp. H		1	1	1790	1790	Y
Protoptilidae
Distichoptilum gracile	Verrill, 1882	1	1	1015.05	1015.05
Protoptilum n. sp. B [GAB Mus. Rec., 2015]		305	5	2724.9	3021.4	Y	Y	Y	Y
Protoptilum n. sp. C		1	1	3292.5	3292.5	Y
Scleroptilidae
Scleroptilum grandiflorum	Koelliker, 1880	1	1	3292.5	3292.5
Umbellulidae
Umbellula lindahli	Kölliker, 1875	15	5	1526.6	2259.03		Y	Y	Y
Umbellula pellucida	Kükenthal, 1902	96	11	1004.65	2725.55		Y		Y
Umbellula thomsoni	Koelliker, 1880	2	1	4090	4090
Umbellula n. sp. D		22	3	1790	1843	Y
Umbellula n. sp. E		1	1	1814.58	1814.58	Y
Umbellula n. sp. F		2	2	1814.58	1843	Y
Umbellula n. sp. G		9	1	1843	1843	Y
Umbellula n. sp. H		2	1	1814.57	1814.57	Y
Umbellula sp.		1	1	3464.5	3464.5
ACTINIARIA
Actinernidae
Actinernus elongatus	(Hertwig, 1882)	8	8	2251.08	4090		Y		Y
Actinernus cf. elongatus		8	2	986.6	2825.55
Actinernus michaelsarsi	Carlgren, 1918	1	1	4090	4090
Synactinernus elegans	(Wassilieff, 1908)	1	1	409.85	1393
Isactinernus cf. quadrilobatus		1	1	409.85	409.85
Actiniidae
Actiniidae sp.	(Hertwig, 1882)	1	1	2724.9	2724.9		Y	Y	Y
Bolocera kerguelensis	Studer, 1879	1	1	2524.84	2524.84
Bolocera sp. 1		6	4	1004.65	3067.16
Actinoscyphiidae
Actinoscyphia plebeia	(McMurrich, 1893)	1	1	3883.5	3883.5		Y		Y
Actinoscyphia sp. 1		3	3	995.55	2725.55	Y
Alvinactis sp. 1		1	1	3062.72	3062.72	Y	Y	Y	Y
Actinostolidae
Actinostola sp. 1		1	1	4022	4022	Y
Actinostolidae sp. 1		4	4	989.6	4961	Y	Y	Y	Y
Actinostolidae sp. 2		5	2	986.6	1467.65		Y	Y	Y
Sicyonis sp. 1		8	4	1842.4	3883.5	Y	Y		Y
Stomphia sp.		3	1	409.85	409.85		Y
Amphianthidae
Amphianthus sp. 1		15	8	3292.5	3793.5	Y
Amphianthus sp. 2		2	2	4090	4090	Y
Amphianthus sp. 3		1	1	2781.26	2781.26	Y
Amphianthus sp. 4		1	1	1338	1338	Y
Stephanauge sp. 1		16	7	995.55	4961	Y
Stephanauge sp. 2		23	2	2724.9	3021.4
Andvakiidae
Epiphellia sp. 1		32	1	1699.05	1699.05
Bathyphelliidae
Bathyphellia sp. 1		117	3	3062.72	4961	Y
Hormathiidae
Actinauge sp. 1		15	7	1004.65	1960.9	Y	Y	Y	Y
Actinauge sp. 2		7	5	1393	3070.6	Y
Actinauge sp. 3		3	1	3793.5	3793.5	Y
?Chondrophellia sp. 1		15	4	1653.38	3066.2	Y
Hormathia sp. 1		29	8	986.6	4012.65	Y	Y	Y	Y
Hormathiidae sp. 1		139	6	382.6	4961	Y
Hormathiidae sp. 2		3	2	1526.6	3063.22	Y
Hormathiidae sp. 3		1	1	1467.65	1467.65
Hormathiidae sp. 4		4	1	2839.5	2839.5
Hormathiidae sp. 5		3	1	2839.5	2839.5
Hormathiidae sp. 6		1	1	1467.65	1467.65
Hormathiidae sp. 7		6	2	1020.9	2839.5
Hormathiidae sp. 8		2	2	2724.9	2825.55
Hormathiidae sp. 9		1	1	1526.6	1526.6
Monactis vestita	(Gravier, 1918)	9	2	4684	4961		Y	Y	Y
Monactis cf. vestita	(Gravier, 1918)	334	10	989.6	4606.8
Paracalliactis rosea	Hand, 1976	6	3	1790	2524.84		Y	Y	Y
Paracalliactis cf. rosea	Hand, 1976	95	14	995.55	3021.4
Paracalliactis sp. 1		81	12	989.6	2725.55	Y
Paraphelliactis sp. 1		11	6	1380.81	3063.52	Y
Kadosactinidae
Kadosactis antarctica	(Carlgren, 1928)	27	2	3793.5	4961
Pacmanactis sp. 1		6	3	382.6	411.7	Y
?Pacmanactis sp. 1		1	1	1393	1393	Y
Unknown Family
Actiniaria sp. 1		16	3	409.85	3061	Y
Actiniaria sp. 2		21	4	409.85	3062.72	Y
Actiniaria sp. 3		3	2	1526.6	3883.5	Y
Actiniaria sp. 4		2	2	1526.6	4090	Y
Actiniaria sp. 5		2	2	411.7	3070.6	Y
Actiniaria sp. 6		2	2	1934.05	1790	Y
Actiniaria sp. 7		2	2	411.7	2802.9
Actiniaria sp. 8		1	1	1552.65	1552.65
Actiniaria sp. 9		1	1	425.65	425.65
CORALLIMORPHARIA
Corallimorphidae
Corallimorphus niwa	Fautin, 2011	5	2	1790	1843
Corallimorphus sp. 1		9	6	2014	3292.5
Corynactis sp. 1		35	2	411.7	425.65
SCLERACTINIA
Anthemiphylliidae
Anthemiphyllia dentata	(Alcock, 1902)	2	1	217.5	217.5		Y		Y
Caryophylliidae
Caryophyllia sp. nov (cf C. quadragenaria)		1	1	995.55	995.55	Y	Y		Y
Caryophyllia planilamellata	Dennant, 1906	411	10	221.35	1843		Y	Y	Y
Caryophyllia sp. nov		6	2	1381	1393	Y	Y		Y
Desmophyllum dianthus	(Esper, 1794)	1	1	1380.81	1380.81		Y	Y	Y
Paraconotrochus zeidleri	Cairns & Parker, 1992	1	1	411.7	411.7		Y	Y	Y
Solenosmilia variabilis	Duncan, 1873	19	4	986.6	1393
Stephanocyathus sp. nov		6	2	995.55	995.55	Y
Stephanocyathus platypus	(Moseley, 1876)	26	1	995.55	995.55		Y	Y	Y
Stephanocyathus spiniger	(Marenzeller, 1888)	177	8	217.5	995.55		Y		Y
Deltocyathiidae
Deltocyathus magnificus	Moseley, 1876	878	9	208.7	4090
Flabellidae
Flabellum magnificum	Marenzeller, 1904	18	2	382.6	409.85		Y
Flabellum tuthilli	Hoffmeister, 1933	170	3	388.1	425.65
Truncatoflabellum sp. nov.		61	5	217.5	409.85	Y
Truncatoflabellum sp. nov. (cf T. vigintiforium?)		5	1			Y
Micrabaciidae
Letepsammia formosissima	(Moseley, 1876)	1	1	425.65	425.65		Y	Y	Y
BRACHIOPODA
Cancellothyrididae
Cancellothyris hedleyi	(Finlay, 1927)	155	4	208.7	411.7		Y	Y	Y
Craniidae
Craniidae sp. 1		5	1	1386.65	1386.65
Dallinidae
Jaffaia jaffaensis	(Blochmann, 1910)	184	7	198.85	986.6		Y	Y	Y
Discinidae
Discinidae sp. 1		22	3	1526.6	2240.65
Unknown family
Brachiopoda sp.		8	7	189.15	1655.17
BRYOZOA
Adeonidae
Adeonellopsis sp.			1	189.15	189.15
Adeonidae sp.			1	208.7	208.7
Flustridae
Flustridae sp.			1	208.7	208.7
Lepraliellidae
Celleporaria sp.		2	4	189.15	1552.65
Lepraliellidae sp.			1	221.35	221.35
Phidoloporidae
Phidoloporidae sp.			1	208.7	208.7
ANNELIDA
SIPUNCULA
Unknown family
Sipuncula sp. 1		10	7	1526.6	2100.2
Sipuncula sp. 2		797	25	1467.65	3883.5
Sipuncula sp. 3		16	2	2724.9	2725.55
Sipuncula sp. 4		1	1	1699.05	1699.05
Sipuncula sp. 5		164	7	986.6	1934.05
Sipuncula sp. 6		4	2	1349	3021.4
Sipuncula sp. 7		38	2	388.1	1004.65
Sipuncula sp. 8		7	3	3292.5	3793.5
ECHIURA
Unknown family
Echiura sp.		21	5	1699	3884
POLYCHAETA'
Ampharetidae
Ampharetidae sp. 1		3	2	4012.65	4684	Y
Ampharetidae sp. 2		7	3	1701.35	2073.67	Y
Ampharetidae sp. 3		3	2	2724.9	2825.55
Ampharetidae sp. 4 [GAB]		18	6	1790	3883.5	Y
Melinnopsis sp. MoV 6853		3	4	1995.4	3062.72	Y
Amphinomidae
Bathychloeia sibogae	Horst, 1910	22	12	138	2073.67		Y	Y	Y
Chloeia australis		2	3	141	141
Linopherus sp. MoV 6845		2	3	436.8	2073.67	Y
Pareurythoe sp. MoV 6855		11	6	189.15	2866.8	Y	Y	Y	Y
Aphroditidae
Aphrodita goolmarris	Hutchings & McRae, 1993	51	15	388.1	2839.5		Y		Y
Laetmonice yarramba	Hutchings & McRae, 1993	322	21	189.15	3883.5		Y		Y
Capitellidae
Notomastus sp. MoV 6840		8	6	436.8	3771.01	Y	Y	Y	Y
Chaetopteridae
Mesochaetopterus sp.		2	2	3050.88	3771.01	Y
Cirratulidae
Aphelochaeta sp. MoV 6842		34	21	189.3	3927	Y
Aphelochaeta sp. MoV 6856		8	5	378.4	2014.2	Y
Aphelochaeta sp. MoV 7073		1	1	1349	1349	Y	Y		Y
Aphelochaeta sp. MoV 7074		3	3	2168.6	2866.8	Y	Y	Y	Y
Chaetozone sp. MoV 7072		11	8	1255.5	2011.9	Y	Y	Y	Y
Chaetozone sp.		2	2	141	141	Y	Y	Y	Y
Cirratulus sp.		1	1	409.85	409.85
Cossuridae
Cossura sp. MoV 6841		2	2	1018.1	1475.3	Y
Dorvilleidae
Schistomeringos sp. 1		1	1	932.4	932.4	Y
Eulepethidae
Pareulepis malayana	(Horst, 1913)	3	2	436.8	478.2		Y		Y
Eunicidae
Eunice sp. MoV 5794		6	2	198.85	208.7	Y	Y	Y	Y
Eunice sp. MoV 5797		1	1	1381	1381	Y	Y	Y	Y
Eunice sp. MoV 6033		28	5	221.35	986.6	Y	Y	Y	Y
Eunice sp. MoV 6036		27	6	409.85	3070.6	Y	Y	Y	Y
Marphysa sp. 1		4	1	189.15	189.15
Fabriciidae
?Fabricola sp.		1	1	1177.5	1177.5	Y	Y	Y
Fabriciidae sp. 1		2	1	2062.91	2062.91
Pseudofabriciola sp.		1	1	1380.5	1380.5	Y
Fauveliopsidae
Laubieriopsis sp. MoV 7075		11	5	932.4	4068.05	Y
Flabelligeridae
Brada sp. MoV 7076		2	2	1349	1380.5	Y
Diplocirrus sp. MoV 6857		2	2	932.4	1490	Y
Diplocirrus sp. MoV 7083		4	5	141	4115.4	Y
Flabelliderma sp.		1	1	1475.3	1475.3	Y
Glyceridae
Glycera lapidum	Quatrefages, 1866	18	13	212.4	2062.91		Y		Y
Glycerella magellanica	(McIntosh, 1885)	1	1	2502.93	2502.93		Y		Y
Goniadidae
Bathyglycinde profunda	(Hartman & Fauchald, 1971)	2	1	2062.91	2062.91
Goniada antipoda	Augener, 1927	1	1	2365.7	2365.7		Y		Y
Progoniada regularis	Hartman, 1965	1	1	1486.2	1486.2		Y		Y
Progoniada sp. MoV 7077		8	5	932.4	4068.05	Y
Hesionidae
Hesiolyra sp.		1	1	996.2	996.2		Y
Leocrates chinensis	Kinberg, 1866	9	4	986.6	1402.35
Nereimyra sp.		1	1	1255.5	1255.5	Y
Parahesione sp. MoV 6858		7	3	203.2	235.9	Y
Lumbrineridae
cf. Abyssoninoe sp.		4	4	996.2	1607.35	Y
Magelonidae
Magelona sp. MoV 6859		2	2	478.2	2168.6	Y
Maldanidae
Maldanella sp. MoV 6860		1	1	376.3	376.3	Y
Nephtyidae
Aglaophamus gippslandicus		3	6	138	141		Y		Y
Aglaophamus profundus	Rainer & Hutchings, 1977	1	1	3713.85	3713.85		Y		Y
Aglaophamus sp. MoV 7086		1	1	3464.5	3464.5	Y
Micronephthys sp. MoV 6847		5	4	204.2	1520.5	Y	Y	Y	Y
Nereididae
Neanthes bassi	Wilson, 1984	15	8	198.85	4517.55		Y	Y	Y
Nicon sp.		1	1	1380.5	1380.5	Y
Onuphidae
Anchinothria sp. 1		15	6	989.6	1790	Y
Anchinothria sp. 3		2	2	3044.4	3045.7	Y
Hyalinoecia sp.		13	4	208.7	357.6	Y
Kinbergonuphis sp.		1	1	1007.15	1007.15
Kinbergonuphis 'large sp.'		3	4	141	2466.59	Y	Y	Y	Y
Kinbergonuphis 'small sp.'		2	3	138	138	Y
Nothria sp. A		6	1	1790	1790	Y	Y	Y
Nothria sp.		14	7	409.85	1598.85
Paradiopatra sp. MoV 6846		1	1	436.8	436.8	Y
Paradiopatra n. sp.		1	1	3793.5	3793.5	Y
Opheliidae
Armandia sp.		5	4	983.1	1701.35
Opheliidae sp. GAB1		3	2	995.9	996
Ophelina sp. MoV 7078		3	6	1349	3062.34	Y
Polyophthalmus cf. translucens	Hartman, 1960	13	6	378.4	4068.05	Y
Orbiniidae
Leitoscoloplos sp. MoV 6848		2	3	478.2	3055.69	Y
Leitoscoloplos sp. MoV 7082		1	1	3055.69	3055.69	Y
Naineris sp. MoV 6843		4	4	1438.2	1560.2	Y
Naineris sp. MoV 6844		3	3	1438.2	2014.2	Y
Naineris sp. MoV 7071		20	15	989.6	3734.55	Y	Y	Y
Paralacydoniidae
Paralacydonia sp. MoV 6861		1	1	378.4	378.4	Y
Paraonidae
Aricidea (Acmira) sp. 1		3	2	3055.69	3063.52	Y
Aricidea (Acmira) sp. 2		1	1	1380.5	1380.5	Y
Aricidea sp. 1		2	2	421.4	932.4	Y
Aricidea (Allia) sp. 2		1	1	3063.52	3063.52	Y
Paradoneis sp. 1		19	19	421.4	3063.52	Y
Phyllodocidae
Phyllodoce duplex	McIntosh, 1885	9	5	409.85	1835.95		Y	Y	Y
Protomystides sp.		1	1			Y	Y		Y
Pseudomystides sp. 1		2	2	995	1154.1	Y
Pilargidae
Litocorsa sp. MoV 6862		3	4	141	204.2	Y	Y
Poecilochaetidae
Poecilochaetus sp. MoV 6595		9	7	996	2012.9	Y	Y		Y
Polycirridae
Polycirrus sp.		9	2	986.6	1651.9
Polynoidae
Arctonoinae sp. 1 [GAB]		7	2	1375	1393	Y
Arctonoinae sp. 2 [GAB]		2	1	1371	1371	Y
Arctonoinae sp. 3 [GAB]		2	1	1350	1350	Y
Euphione sp. MoV 6636		3	1	388.1	388.1		Y		Y
Harmothoe sp. 1		14	4	986.6	1335.4
Harmothoe sp. 2		5	2	1331.5	1335.4
Harmothoe sp. 3		2	2	986.6	1835.95
Harmothoe sp. 4		1	1	986.6	986.6
Hyperhalosydna striata	(Kinberg, 1856)	2	1	208.7	208.7		Y		Y
Lepidasthenia sp. 1		1	1	1392.2	1392.2	Y
Lepidonotinae sp. 1		10	3	208.7	388.1	Y
Lepidonotinae sp. 2 [GAB]		4	3	3793.5	4090	Y
Lepidonotus carinulatus	(Grube, 1870)	4	1	409.85	409.85		Y		Y
Malmgrenia sp. 1		2	2	1020.9	1478.05	Y
Polynoid sp. MoV 6642		1	1	1365	1365	Y	Y		Y
Polynoinae sp. 5		5	2	425.65	1026.65	Y
Sabellariidae
Gesaia sp. 1		7	3	932.4	1835.95	Y
Sabellidae
Euchone sp. MoV 6863		5	8	1013.6	3016.38	Y
Euchone sp. MoV 7085		14	3	1171.3	1380.5	Y
Jasmineira sp.		1	1	2466.59	2466.59	Y
Perkinsiana sp.		2	1	1380.5	1380.5
Potamethus sp.		7	7	1380.5	4961	Y
Pseudopotamilla cf. monoculata	Capa, 2007	1	1	409.85	409.85		Y	Y	Y
Sabellidae sp. 2		1	1	3042.08	3042.08
Scalibregmatidae
Pseudoscalibregma sp.		1	1	2760.9	2760.9	Y
Travisia sp. MoV 6864		1	1	376.3	376.3	Y
Travisia sp. MoV 763		5	4	141	203.2	Y	Y		Y
Serpulidae
Apomatus sp. 1		44	2	388.1	986.6
Bathyvermilia gregrousei	Kupriyanova & Ippolitov, 2015	1	1	4606.8	4606.8
Hyalopomatus sp. A		1	1	2522.1	2522.1	Y	Y	Y	Y
Hyalopomatus sp. B		1	2	1338	3464.5	Y
Hyalopomatus sp.		3	3	1386.65	4012.65
Metavermilia sp.		10	1	409.85	409.85
Neovermilia sphaeropomatus	(Benham, 1927)	30	1	986.6	986.6
Protis sp. 1		2	1	3061	3061	Y	Y	Y	Y
Protis sp.		33	5	1168.85	4606.8
Protula sp.		1	1	208.7	208.7
Serpula sp.		2	2	409.85	478.2
Vermiliopsis sp.		12	1	411.7	411.7
Siboglinidae
Siboglinidae sp.		12	7	436.8	4012.65	Y
Sigalionidae
Fimbriosthenelais sp.		1	1	217.5	217.5
Leanira sp. 1		3	4	1779.1	3042.08	Y
Sigalion sp. MoV 333		3	6	138	141	Y
Sigalion sp. MoV 6865		3	3	376.3	2079.1	Y
Sthenelais sp. MoV 6866		3	3	983.1	1438.2	Y
Spionidae
Dipolydora sp.		2	2	1015.05	2114.2
Laonice bassensis	Blake & Kudenov, 1978	2	2	983.1	1486.2		Y		Y
Laonice sp. 1		5	3	996.2	1904.2	Y	Y
Laonice sp. 2		2	2	3050.91	3052.4	Y
Laonice sp. MoV 6352		1	1	212.4	212.4	Y	Y		Y
Microspio sp. MoV 6851		1	1	1520.5	1520.5	Y
Microspio sp. MoV 6867		1	1	212.4	212.4	Y
Microspio sp. MoV 7079		3	4	1380.5	3052.4	Y
Microspio sp. MoV 7080		41	18	995.9	3927	Y
Prionospio sp. 1		1	1	1768.7	1768.7	Y
Prionospio sp. 2		2	3	3282.05	3282.05	Y
Prionospio sp. MoV 6849		4	3	378.4	3061	Y
Prionospio sp. MoV 6850		1	1	2094.5	2094.5	Y
Prionospio sp. MoV 6852		3	3	1320.7	3061	Y
Spionidae sp. 1		7	4	1486.2	1607.35
Spiophanes wigleyi	Pettibone, 1962	12	9	138	436.8		Y		Y
Syllidae
Eusyllinae sp. 1		2	3	421.4	3061	Y
Eusyllinae sp. 2		2	2	235.9	3061	Y
Exogoninae sp. 1		1	1	212.4	212.4
Exogoninae sp. 2		1	1	204.2	204.2
Exogoninae sp. 3		1	1	212.4	212.4
Exogoninae sp. 4		4	3	1005.2	1904.2
Exogoninae sp. 5		1	1	1349	1349
Exogoninae sp. 6		1	1	932.4	932.4
Exogoninae sp. 7		4	5	996	2934.5	Y	Y
Exogoninae sp. 8		2	2	1349	4068.05
Exogoninae sp. 9		1	1	2934.5	2934.5	Y
Syllinae sp. 1		5	8	204.2	2934.5	Y
Syllinae sp. 2		1	1	189.3	189.3
Syllinae sp. 3		4	3	932.4	1255.5
Syllinae sp. 4		2	3	141	141	Y
Terebellidae
Terebellidae sp. 1		1	1	1380.5	1380.5
Terebellidae sp. 2		1	1	1349	1349
Terebellidae sp.		4	4	1651.9	2783.85
Trichobranchidae
Trichobranchidae sp.		1	1	1767.3	1767.3
Trichobranchus sp.		1	1	995	995
OLIGOCHAETA
?Enchytraeidae
?Enchytraeidae sp. 1		19	9	1171.7	3062	Y
?Tubificidae
?Tubificidae sp. 1		17	7	1154.1	2229.7
?Tubificidae sp. 2		3	1	1171.3	1171.3
MOLLUSCA
APLACOPHORA
CAUDOFOVEATA
Chaetodermatidae
Falcidens sp. MoV 6897		1	1	436.8	436.8	Y
Epimeniidae
Epimeniidae sp. 1		5	3	382.6	411.7
Unknown family
Aplacophora sp. 1		1	1	995.55	995.55
Aplacophora sp. 2		16	1	189.15	189.15
SOLENOGASTRES
Clionoidea sp.		1	1	3883.5	3883.5
Solenogastres sp.		1	1	1380.81	1380.81
POLYPLACOPHORA
Acanthochitonidae
Notoplax sp. 1		3	3	1041.05	1041.05
BIVALVIA
Arcidae
Bathyarca perversidens	Hedley, 1902	2	2	2114.2	2240.65		Y	Y	Y
Bentharca asperula	(Dall, 1881)	1	1	1526.6	1526.6		Y
Cardiidae
Pratulum thetidis	(Hedley, 1902)	1	1	283.2	283.2		Y	Y	Y
Cuspidariidae
Bathyneaera sp. 1		1	1	2466.59	2466.59
Cuspidaria erma	Cotton, 1931	1	1	388.1	388.1		Y		Y
Cuspidaria sp. 1		1	1	4606.8	4606.8
Cuspidaria sp. 2		6	4	1020.9	1960.9		Y		Y
Cuspidaria sp. 3		1	1	3292.5	3292.5
Myonera paucistriata	Dall, 1886	1	1	1862.95	1862.95
Myonera sp. 1		1	1	4684	4684
Galeommatidae
Axinodon cf. bornianus	(Dall, 1908)	113	7	3292.5	4961
Galeommatidae sp. 1		1	1	3292.5	3292.5
Limidae
Lima cf. benthonimbifer	Iredale, 1925	4	2	382.6	409.85		Y	Y	Y
Limatula sp. 1		4	2	2079.1	2114.2
Limopsidae
Limopsis sp. 1		5	1	1335.4	1335.4
Limopsis sp. 2		57	3	382.6	409.85
Limopsis sp. 3		1265	6	2003.9	3464.5
Lyonsiellidae
Allogramma cf. oahuensis	(Dall, 1913)	1	1	1526.6	1526.6
Policordia sp. 1		2	2	1526.6	3292.5
Policordia sp. 2		6	2	2839.5	3292.5
Malletiidae
Protonucula verconis	Cotton, 1930	1	1	2094.5	2094.5		Y	Y	Y
Mytilidae
Dacrydium sp. 1		1	1	1255.5	1255.5
Nuculidae
Ennucula dilecta	(E. A. Smith, 1891)	1	1	421.4	421.4		Y	Y	Y
Nucula cf. praetenta	Iredale, 1924	133	3	986.6	3292.5		Y		Y
Nuculanidae
Ledella sp. 1	(E. A. Smith, 1885)	3	2	3292.5	3464.5		Y		Y
Nuculanidae sp. 1		5	2	4684	4961
Pectinidae
Delectopecten fosterianus	(Powell, 1933)	20	4	986.6	1526.6		Y	Y	Y
Hyalopecten sp. 1		3	3	1835.95	1960.9
Hyalopecten sp.		2	2	1381	3292.5
Talochlamys pulleineana	(Tate, 1887)	5	2	208.7	283.2		Y	Y	Y
Veprichlamys perillustris	(Iredale, 1925)	15	5	357.6	425.65		Y	Y	Y
Poromyidae
Cetoconcha sp. 1		1	1	388.1	388.1
Poromya sp. 1		2	2	3793.5	4606.8
Poromya sp. 2		1	1	1526.6	1526.6
Propeamussiidae
Parvamussium maorium	Dell, 1956	10	1	409.85	409.85
Propeamussium meridionale	(E. A. Smith, 1885)	276	12	1835.95	4961
Semelidae
Abra profundorum	(E. A. Smith, 1885)	60	18	1767.3	4012.65		Y
Tindariidae
Tindaria sp. 1		1	1	4676.5	4676.5
Tindaria sp. 2		30	7	1015.05	4684
Verticordiidae
Spinosipella deshayesiana	(P. Fischer, 1862)	2	1	388.1	388.1		Y	Y	Y
Verticordia sp. 1		2	2	1467.65	1526.6
Vesicomyidae
Vesicomya cf. atlantica	(E. A. Smith, 1885)	2	2	1171.7	3713.85
Vesicomya cf. indica	(Knudsen, 1970)	53	5	4517.55	4961
SCAPHOPODA
Dentaliidae
Dentaliidae sp.		7	5	986.6	3877.7	Y
Fissidentalium cf. horikoshi		181	3	3304.7	3853.9
Fissidentalium ponderi	Lamprell & Healy, 1998	18	4	382.6	425.65		Y	Y	Y
Fissidentalium profundorum	(E. A. Smith, 1894)	117	9	1478.05	3883.5		Y	Y	Y
Fissidentalium sp.		115	5	409.85	1526.6	Y
Graptacme sp. 1		9	4	2825.55	4090	Y
Graptacme sp. 2		22	1	4961	4961	Y
Entalinidae
Rhomboxiphus tricarinatus	(Boissevain, 1906)	21	2	1331.5	1526.6		Y		Y
Gadilidae
Gadila andersoni	Lamprell & Healy, 1998	4	2	986.6	1015.05		Y	Y	Y
Gadilidae sp.		1	1	995.9	995.9
Laevidentaliidae
Laevidentalium leptosceles	Cossmann, 1888	46	4	4606.8	4961		Y	Y	Y
CEPHALOPODA
Argonautidae
Argonauta nodosus	Lightfoot, 1786	1	1	1862.95	1862.95		Y	Y	Y
Cranchiidae
Cranchiidae sp.		2	1	189.15	189.15		Y	Y	Y
Teuthowenia pellucida	(Chun, 1910)	1	1	1006.4	1006.4		Y	Y	Y
Eledonidae
Eledone palari	Lu & Stranks, 1992	6	3	189.15	283.2		Y	Y	Y
Enteroctopodidae
Muusoctopus sp. 1		5	4	1006.4	1835.95	Y	Y	Y	Y
Histioteuthidae
Histioteuthis bonnellii	(Ferrussac, 1834)	1	1	1790	1790		Y	Y	Y
Histioteuthis macrohista	Voss, 1969	1	1	1843	1843		Y	Y	Y
Joubiniteuthidae
Joubiniteuthis portieri	(Joubin, 1916)	1	1	2240.65	2240.65		Y		Y
Octopodidae
Octopus pallidus	Hoyle, 1885	2	1	198.85	198.85		Y	Y	Y
Octopus sp. 1		1	1	189.15	189.15	Y
Octopus sp. 2		1	1	388.1	388.1	Y
Opisthoteuthidae
Opisthoteuthis persephone	Berry, 1918	8	5	382.6	2003.9		Y	Y	Y
Opisthoteuthis pluto	Berry, 1918	4	3	1004.65	1814.57		Y	Y	Y
Pyroteuthidae
Pyroteuthis cf. margaritifera	(Rüppell, 1844)	5	4	1021.4	1492.15		Y	Y	Y
Sepiidae
Sepia cottoni	Adam, 1979	2	2	221.35	283.2		Y		Y
Sepia cultrata	Hoyle, 1885	22	4	189.15	425.65		Y	Y	Y
Sepia hedleyi	Berry, 1918	1	1	189.15	189.15		Y	Y	Y
Sepiolidae
Austrorossia australis	(Berry, 1918)	2	1	425.65	425.65		Y	Y	Y
Heteroteuthis hawaiiensis	(Berry, 1909)	2	2	409.85	1004.65
Heteroteuthis sp.		1	1	1843	1843		Y	Y	Y
Sepiolina sp. 1		8	2	388.1	425.65	Y	Y	Y	Y
Spirulidae
Spirula spirula	(Linnaeus, 1758)	1	1	995.55	995.55		Y
Vampyroteuthidae
Vampyroteuthis infernalis	Chun, 1903	1	1	1552.65	1552.65		Y	Y	Y
GASTROPODA
Aglajidae
Philinopsis troubridgensis	(Verco, 1909)	7	3	382.6	409.85		Y	Y	Y
Arminidae
Armina sp. 1		5	2	189.15	198.85
Heterodoris sp. 1		3	2	986.6	1020.9	Y
Heterodoris sp. 2		5	1	995.55	995.55	Y
Heterodoris sp. 3		1	1	411.7	411.7	Y
Belomitridae
Belomitra sp. 1		1	1	2725.55	2725.55	Y
Belomitra sp. 2		1	1	1020.9	1020.9	Y
Borsoniidae
Bathytoma agnata	Hedley & Petterd, 1906	22	5	382.6	425.65		Y	Y	Y
Typhlomangelia sp. 1		2	2	995.55	1020.9	Y
Cadlinidae
Cadlina sp. 1		1	1	388.1	388.1
Calliostomatidae
Calliostoma (Maurea) sp. 1		2	1	409.85	409.85	Y
Calliotropidae
Calliotropis canaliculata	Jansen, 1994	62	8	986.6	1526.6		Y		Y
Calliotropis carinata	Jansen, 1994	213	7	986.6	1526.6		Y		Y
Lischkeia sp. 1		1	1	4012.65	4012.65	Y
Cassidae
Oocorys sulcata	P. Fischer, 1884	6	4	986.6	1934.05		Y		Y
Semicassis pyrum	(Lamarck, 1822)	1	1	409.85	409.85		Y	Y	Y
Cypraeidae
Umbilia armeniaca	Verco, 1912	1	1	189.15	189.15		Y	Y	Y
Discodorididae
Jorunna sp. 1		2	1	411.7	411.7
Sclerodoris sp. 1		2	2	208.7	221.35
Dorididae
Dorididae sp. 1		4	4	986.6	1026.65
Dorididae sp. 5		38	1	1168.85	1168.85
Drilliidae
Splendrillia sp. 1		1	1	382.6	382.6	Y
Epitoniidae
Amaea sp. 1		3	1	2825.55	2825.55	Y
Amaea sp. B		1	1	1020.9	1020.9	Y
Amaea sp.		1	1	3292.5	3292.5				Y
Cycloscala sp.		2	1	3292.5	3292.5	Y			Y
Epitonium (Sodaliscala) sp. 1		1	1	986.6	986.6	Y
Globiscala cf. bonaespei	(Barnard, 1963)	1	1	1467.65	1467.65
Gregorioscala sp. 1		1	1	1021.4	1021.4	Y
Eulimidae
Eulima acutissima	(G. B. Sowerby II, 1866)	1	1	1015.05	1015.05		Y	Y	Y
Sticteulima sp.		1
Fasciolariidae
Chryseofusus alisonae	(Hadorn, Snyder & Fraussen, 2008)	1	1	425.65	425.65		Y	Y	Y
Fusinus pyrulatus	(Reeve, 1847)	1	1	189.15	189.15		Y	Y	Y
Granulifusus kiranus	Shuto, 1958	43	4	382.6	425.65		Y		Y
Granulifusus sp. 1		1	1	409.85	409.85	Y
Granulifusus sp. 2		2	1	388.1	388.1	Y
Fissurellidae
Emarginula superba	Hedley, 1906	7	2	382.6	409.85		Y	Y	Y
Puncturella sp. 1		2	1	986.6	986.6	Y
Rimulanax corolla	(Verco, 1908)	237	5	382.6	425.65		Y	Y	Y
Haloceratidae
Haloceratidae New genus sp. 1		29	1	1350	1350	Y
Haminoeidae
Haminoea sp.		1	1	1015.05	1015.05
Hipponicidae
Malluvium devotum	(Hedley, 1904)	1	1	221.35	221.35		Y	Y	Y
Marginellidae
Volvarina sp. 1		1	1	1960.9	1960.9	Y
Muricidae
Emozamia licina	(Hedley & Petterd, 1906)	2	1	388.1	388.1		Y		Y
Enatimene sp. 1		1	1	388.1	388.1	Y
Enixotrophon carduelis	(Watson, 1882)	57	10	411.7	1027.2		Y	Y	Y
Enixotrophon eumorphus	(B. A. Marshall & Houart, 2011)	1	1	1372	1372		Y		Y
Enixotrophon cf. plicilaminatus		1	1	388.1	388.1	Y	Y		Y
Enixotrophon obtuseliratus	(Schepman, 1911)	1	1	1467.65	1467.65		Y		Y
Enixotrophon plicilaminatus	(Verco, 1909)	3	1	388.1	388.1		Y		Y
Hirtomurex teramachii	(Kuroda, 1959)	1	1	995.55	995.55		Y		Y
Muricidae New genus sp. 1		5	3	1467.65	1835.95	Y
Nassariidae
Tritia ephamilla	(Watson, 1882)	18	6	986.6	1526.6		Y	Y	Y
Nassarius sp.		4	3	137	137
Naticidae
Polinices sp. 1		45	13	986.6	3292.5
Newtoniellidae
Ataxocerithium sp. 1		1	1	388.1	388.1	Y
Ataxocerithium sp. 2		1	1	2079.1	2079.1
Ataxocerithium sp.		1	1	3292.5	3292.5
Cerithiella sp. 1		1	1	1015.05	1015.05
Pleurobranchidae
Berthella sp.		1	1	409.85	409.85
Pleurobranchidae sp.		1	1	388.1	388.1
Pleurobranchus hilli	(Hedley, 1894)	4	2	409.85	411.7		Y	Y	Y
Pseudomelatomidae
Comitas sp. 1		35	6	1020.9	1934.05	Y
Inquisitor sp.		1	1	388.1	388.1
Ptychatractidae
Exilioidea sp. 1		8	5	1526.6	2825.55	Y
Exilioidea sp.		4	2	1790	3292.5	Y
Ranellidae
Fusitriton sp.		3	1	1355.72	1355.72		Y
Monoplex exaratus	(Reeve, 1844)	3	1	221.35	221.35		Y	Y	Y
Sassia garrardi	(Beu, 1970)	1	1	382.6	382.6		Y	Y	Y
Sassia kampyla	(Watson, 1883)	7	1	411.7	411.7		Y	Y	Y
Raphitomidae
Abyssothauma sp. 1		7	3	2825.55	3464.5	Y
Asperdaphne sp. 1		1	1	388.1	388.1	Y
Bathybela sp. 1		5	4	1835.95	2724.9	Y
Bathybela sp. 2		4	2	1526.6	1552.65	Y
Famelica sp. 1		1	1	1790	1790	Y
Gymnobela sp. 1		5	2	1934.05	2724.9	Y
Gymnobela sp. 2		67	13	986.6	1526.6	Y
Gymnobela sp. 3		1	1	2839.5	2839.5	Y
Gymnobela sp. 4		5	3	2839.5	3464.5	Y
Gymnobela sp. 5		11	3	2825.55	3464.5	Y
Gymnobela sp. 6		27	9	2725.55	4961	Y
Gymnobela sp. 7		2	1	1335.4	1335.4	Y
Gymnobela sp. 8		2	2	3292.5	3793.5	Y
Neopleurotomoides sp. 1		1	1	2037.2	2037.2	Y
Pleurotomella sp. 1		2	2	2057.55	3292.5	Y
Spergo aithorrhis	Sysoev & Bouchet, 2001	1	1	1552.65	1552.65
Spergo sp. 1		25	8	1835.95	2839.5	Y
Xanthodaphne sp. 1		3	3	2825.55	4606.8	Y
Rissoidae
Benthonella sp. 1		15	3	986.6	1526.6	Y
Scaphandridae
Scaphander sp.		10	1	1021.4	1021.4	Y
Scaphander sp. 1		4	1	1335.4	1335.4	Y
Scaphander sp. 2		16	4	1467.65	2724.9	Y
Seguenziidae
Hadroconus diadematus	Marshall, 1988	6	3	1015.05	1526.6
Halystes chimaera	B. A. Marshall, 1988	1	1	3092	3092
Halystes sp.		2	2	4090	4676.5
Quinnia polita	(Verco, 1906)	1	1	1015.05	1015.05		Y	Y	Y
Seguenzioidea fam. nov.
Seguenzioidea New genus sp. 1		107	10	986.6	1526.6	Y
Skeneidae
Moelleriopsis sp.		4	1	3292.5	3292.5	Y
Solariellidae
Archiminolia sp. 1		2	1	283.2	283.2	Y
Spectamen philippense	(Watson, 1881)	2	3	141	141		Y	Y	Y
Terebridae
Hastula brazieri	(Angas, 1871)	1	1	411.7	411.7		Y	Y	Y
Triviidae
Trivirostra oryza	(Lamarck, 1810)	1	1	189.15	189.15		Y	Y	Y
Turbinellidae
Columbarium pagodoides	(Watson, 1882)	12	4	382.6	425.65		Y		Y
Turritellidae
Colpospira curialis	(Hedley, 1907)	3	2	986.6	1015.05		Y	Y	Y
Tylodinidae
Tylodinidae sp.		1	1	217.5	217.5
Velutinidae
Velutinidae sp. 1		161	17	1478.05	2114.2	Y
Velutinidae sp. 2		3	2	198.85	221.35	Y
Velutinidae sp. 3		3	1	2037.2	2037.2	Y
Velutinidae sp. 4		1	1	4090	4090	Y
Volutidae
Ericusa sericata	Thornley, 1951	1	1	217.5	217.5		Y		Y
Livonia roadnightae	(McCoy, 1881)	11	6	189.15	411.7		Y	Y	Y
ECHINODERMATA
CRINOIDEA
Hyocrinidae
Anachalypsicrinus sp.		1	1	1355.72	1355.72	Y
Hyocrinus cyanae	Bourseau, Améziane-Cominardi, Avocat & Roux, 1991	1	1	2502.34	2502.34
Ptilometridae
Ptilometra macronema	(Müller, 1846)	5	2	189.15	198.85		Y	Y	Y
Thalassometridae
Thalassometra sp.		1	1	2221.88	2221.88	Y
ASTEROIDEA
Asterodiscididae
Asterodiscides truncatus	(Coleman, 1911)	2	1	198.85	198.85		Y	Y	Y
Astropectinidae
Astropecten sp. 1		6	1	388.1	388.1
Astropecten spp.		1	1	357.6	357.6
Astromesites sp.		1	1	3292.5	3292.5	Y
Astropectinidae sp.		3	2	1402.35	4961
Dytaster pedicellaris	H.E.S Clark & D.G. McKnight, 2000	31	3	3883.5	4684
Dytaster cf. exilis	Sladen, 1889	29	4	3292.5	4961
Dytaster sp. 1		67	16	1478.05	4606.8
Plutonaster complexus	H.E.S Clark & D.G. McKnight, 2000	6	2	1552.65	1960.9		Y		Y
Plutonaster fragilis	H.E.S. Clark, 1970	11	1	2003.9	2003.9
Plutonaster knoxi	Fell, 1958	1	1	1934.05	1934.05
Plutonaster sp.		1	1	4684	4684	Y
Proserpinaster neozelanicus	(Mortensen, 1925)	3	3	382.6	425.65
Proserpinaster sp. 1		4	1	411.7	411.7
Benthopectinidae
Benthopecten cf. munidae	H.E.S. Clark, 1969	125	10	1020.9	2839.5		Y		Y
Benthopecten sp.		1	1	3292.5	3292.5	Y
Benthopectinidae sp. 1		5	1	2037.2	2037.2
Cheiraster sp. 1		2	1	388.1	388.1
Cheiraster sp.		1	1	1790	1790	Y
Pectinaster mimicus	(Sladen, 1889)	7	3	411.7	4606.8		Y		Y
Brisingidae
Brisingidae sp.		2	1	1478.05	1478.05
Hymenodiscus sp. 1		12	6	1331.5	2725.55
Hymenodiscus sp.		3	3	1790	3464.5	Y
Echinasteridae
Henricia sp.		1	1	995.55	995.55		Y	Y
Henricia sp. 1		6	3	986.6	1020.9		Y	Y
Henricia sp. 2		1	1	1020.9	1020.9		Y	Y
Henricia sp. 3		2	2	1004.65	1026.65		Y	Y
Freyellidae
Astrocles sp.		1	1	1338	1338	Y
Freyastera sp.		1	1	4090	4090	Y
Freyella echinata	Sladen, 1889	1	1	3007.91	3007.91
Freyella sp.		2	2	2894.13	4961	Y
Goniasteridae
Ceramaster sp. 1		1	1	1331.5	1331.5	Y
Circeaster sp. 1		1	1	1701.35	1701.35
Goniasteridae sp.		5	2	208.7	940.1
Goniasteridae sp. 2		15	2	1020.9	1526.6
Mediaster sp. 1		8	1	986.6	986.6	Y	Y
Paragonaster sp.		29	6	3292.5	4684	Y
Pillsburiaster cf. aoteanus	(McKnight, 1973)	36	10	995.55	1492.15
Pillsburiaster maini	McKnight, 1973	1	1	1331.5	1331.5
Korethrasteridae
Korethraster sp.		1	1	4961	4961
Peribolaster sp.		1	1	3036.9	3036.9
Luidiidae
Luidia prionota	Fisher, 1913	4	2	388.1	425.65		Y
Ophidiasteridae
Pseudophidiaster rhysus	H.L. Clark, 1916	4	4	189.15	217.5		Y	Y	Y
Paulasteriidae
Paulasterias sp.	Mah et al. 2015	1	1	4090	4090	Y
Pedicellasteridae
Hydrasterias cf. sacculata	McKnight, 2006	6	2	4012.65	4606.8
Tarsaster sp. 1		2	2	1767.3	1767.3
Tarsaster sp.		1	1	4090	4090	Y
Porcellanasteridae
Porcellanasteridae sp.		1	1	4961	4961
Porcellanaster ceruleus	Wyville Thomson, 1878	1	1	1790	1790
Styracaster caroli	Ludwig, 1907	56	4	995.55	4606.8
Styracaster sp.		1	1	4961	4961	Y
Pseudarchasteridae
Paragonaster ridgwayi	McKnight, 1973	1	1	3021.4	3021.4
Perissogonaster insignis	Fisher, 1913	1	1	2724.9	2724.9
Pseudarchaster garricki	Fell, 1958	4	2	1331.5	2037.2		Y		Y
Pseudarchaster sp. 1		1	1	1331.5	1331.5
Pterasteridae
Calyptraster gracilis	Jangoux & Aziz, 1988	21	4	1790	3292.5
Calyptraster sp.		145	7	409.85	3021.4	Y
Diplopteraster sp. 1		1	1	2003.9	2003.9	Y	Y	Y	Y
Diplopteraster sp.		2	1	1790	1790	Y
Hymenaster carnosus	Sladen, 1882	2	2	1651.59	1843
Hymenaster caelatus	Sladen, 1882	67	6	1768.7	2839.5
Hymenaster cf. caelatus	Sladen, 1882	1	1	1815	1815
Hymenaster cf. blegvadi	Madsen, 1956	470	11	382.6	3021.4		Y		Y
Hymenaster echinulatus	Sladen, 1882	70	6	1835.95	2240.65		Y	Y	Y
Hymenaster nobilis	Wyville Thomson, 1878	2	1	2724.9	2724.9
Hymenaster pullatus	Sladen, 1882	84	9	1478.05	2014		Y		Y
Hymenaster sp. 1		1	1	1862.95	1862.95
Hymenaster sp. 2		3	2	1934.05	1960.9
Hymenaster sp.		12	2	1790	1814.57
Pteraster affinis	Smith, 1876	21	6	995.55	1862.95
Pteraster sp. 1		4	1	3001.9	3001.9
Pteraster sp. 2		2	1	411.7	411.7
Pteraster sp.		1	1	3883.5	3883.5
Pterasteridae sp.		1	1	2725.55	2725.55
Solasteridae
Crossaster multispinus	H.L. Clark, 1916	33	6	388.1	1526.6		Y		Y
Lophaster cf. suluensis	Fisher, 1913	1	1	409.85	409.85
Stichasteridae							Y		Y
Cosmasterias dyscrita	H.L. Clark, 1916	1	1	986.6	986.6		Y		Y
Smilasterias clarkailsa	O'Loughlin & O'Hara, 1990	45	4	198.85	382.6		Y		Y
Smilasterias triremis	(Sladen, 1889)	96	2	189.15	217.5
Zoroasteridae
Zoroaster carinatus	Alcock, 1893	2	2	1015.05	1020.9		Y		Y
Zoroaster cf. alternicanthus	McKnight, 2006	3	1	995.55	995.55
Zoroaster barathri	Alcock, 1893	1	1	3292.5	3292.5
Zoroaster cf. barathri	Alcock, 1893	9	5	2724.9	3021.4
Zoroaster cf. singletoni	McKnight, 2006	5	2	1015.05	1168.85
Zoroaster macracantha	H.L. Clark, 1916	2	2	995.55	1021.4		Y	Y	Y
Zoroaster singletoni	McKnight, 2006	3	2	1331.5	2071.93
Zoroaster sp.		1	1	3021.4	3021.4
Zoroaster spinulosus	Fisher, 1906	11	2	1168.85	1335.4		Y		Y
Zoroasteridae sp. 1		1	1	1006.4	1006.4
OPHIUROIDEA
Amphiuridae
Amphioplus daleus		2	1	3883.5	3883.5
Amphioplus sp. MoV 2722		3	2	989.6	1699.05	Y	Y		Y
Amphiura sp.		4	3	1007.15	1790
Amphiura sp. 1		1	1	986.6	986.6
Amphiura sp. MoV 6895		2	1	204.2	204.2	Y
Amphiura sp. MoV 6896		1	1	436.8	436.8	Y
Asteronychidae
Astrodia tenuispina	(Verrill, 1884)	2706	7	1467.65	3464.5		Y	Y	Y
Asteroschematidae
Ophiocreas sibogae	Koehler, 1904	2	2	1701.35	1767.3		Y	Y	Y
Astrophiuridae
Ophiophycis richardi	McKnight, 2003	3	1	1402.35	1402.35
Euryalidae
Ophiocreas sp.		2	2	1657.17	2934.5
Hemieuryalidae
Actinozonella sp.		5	1	3883.5	3883.5
Ophiozonella bispinosa	(Koehler, 1897)	2	2	221.35	357.6		Y	Y	Y
Ophiacanthidae
Ophiacantha brachygnatha	H.L. Clark, 1928	20	4	382.6	411.7		Y	Y	Y
Ophiacantha cosmica		3	2	3883.5	4961
Ophiacantha pacata	Koehler, 1922	8	3	1331.5	1492.15		Y	Y	Y
Ophiacantha rosea	Lyman, 1878	2	2	1699.05	1862.95	Y	Y		Y
Ophiacantha sp. 1		5	1	1699.05	1699.05	Y
Ophiacantha sp. MoV 4533		32	5	1335.4	1862.95	Y	Y		Y
Ophiolebes sp. MoV 3581		4	4	1363.6	1393
Ophiacantha sp. MoV 4537		1	1	1393	1393
Ophiacantha sp.		4	2	1338	2221.88
Ophiomitrella sp. MoV 2779		1	1	1862.95	1862.95	Y	Y		Y
Ophiophthalmus relictus	(Koehler, 1904)	30	3	995.55	1526.6		Y	Y	Y
Ophioplinthaca plicata	(Lyman, 1878)	31	8	1699.05	1862.95		Y	Y	Y
Ophioplinthaca sp.		3	2	1393	2503.4
Ophiactidae
Ophiactis abyssicola	(M. Sars, 1861)	1	1	1651.9	1651.9
Ophiactis amator	Koehler, 1922	2	2	1862.95	2725.55		Y		Y
Ophiactis hirta	Lyman, 1879	10	3	382.6	411.7		Y	Y	Y
Ophiactis resiliens	Lyman, 1879	3	4	141	208.7		Y	Y	Y
Ophiernidae
Ophiernus vallincola	Lyman, 1878	28	9	986.6	1027.2		Y		Y
Ophiobyrsidae
Ophiobyrsa rudis	Lyman, 1878	1	1	388.1	388.1		Y	Y	Y
Ophiodermatidae
Ophiopsammus angusta	Vail & Rowe, 1989	6	2	382.6	409.85		Y		Y
Ophiohelidae
Ophiotholia sp.		2	2	3713.85	4115.4
Ophiolepididae
Ophiomastus cf. tegulitius	Lyman, 1878	3	1	388.1	388.1		Y	Y	Y
Ophiomusaidae
Ophiomusa anisacanthum	(H.L. Clark, 1928)	193	4	357.6	411.7		Y	Y	Y
Ophiomusa australe	(H.L. Clark, 1928)	298	8	189.15	388.1		Y	Y	Y
Ophiomusa incertum	(Koehler, 1903)	60	4	221.35	1007.15		Y		Y
Ophiomusa lymani	(Wyville Thomson, 1873)	5969	41	986.6	3021.4		Y	Y	Y
Ophiomusa scalare	(Lyman, 1878)	4176	10	189.15	995.55		Y	Y	Y
Ophiomyxidae
Ophiomyxa australis	Lütken, 1869	4	4	208.7	283.2		Y	Y	Y
Ophiomyxa crinita	Franklin & O'Hara, 2008	380	8	198.85	425.65		Y	Y	Y
Ophionereididae
Ophiodoris malignus	Koehler, 1904	18	1	409.85	409.85		Y	Y	Y
Ophionereis novaezelandiae	Mortensen, 1936	2	1	221.35	221.35		Y	Y	Y
Ophiopyrgidae
Amphiophiura bullata	(Thomson, 1878)	187	9	3292.5	4606.8		Y		Y
Amphiophiura collecta	H.L. Clark, 1916	40	9	189.15	425.65		Y	Y	Y
Amphiophiura distincta	(Koehler, 1904)	52	5	189.15	283.2		Y	Y	Y
Ophiopyrgus saccharatus	Studer, 1882	10	2	986.6	1006.4		Y		Y
Ophioscolecidae
Ophiolycus sp.	Mortensen, 1933	1	1	989.6	989.6	Y	Y		Y
Ophioscolecidae sp.		1	1	1386.65	1386.65	Y
Ophioscolex sp.		2	3	2724.9	2724.9
Ophiosphalmidae
Ophiosphalma armigerum	(Lyman, 1878)	289	13	2724.9	4684		Y	Y	Y
Ophiothamnidae
Ophiothamnus habrotatus	(H.L. Clark, 1911)	4	2	221.35	235.9		Y	Y	Y
Ophiotretidae
Ophiopristis sp. MoV 5490		1	1	986.6	986.6	Y	Y		Y
Ophiotoma sp. cf. alberti	Koehler, 1896	1	1
Ophiotrichidae
Ophiothrix aristulata	Lyman, 1879	61	9	198.85	425.65		Y	Y	Y
Ophiuridae
Ophiocten australis	Baker, 1979	19744	18	1467.65	4279.15		Y		Y
Ophiura clemens	(Koehler, 1904)	175	9	986.6	1027.2		Y	Y	Y
Ophiura flagellata	(Lyman, 1878)	1	2	985.8	1020.9		Y		Y
Ophiura irrorata	(Lyman, 1878)	29	6	932.4	4961		Y		Y
Ophiura irrorata concreta	(Koehler, 1901)	102	4	1835.95	1960.9		Y		Y
Ophiura ooplax	(H.L. Clark, 1911)	242	5	198.85	411.7		Y	Y	Y
Ophiura rugosa	(Lyman, 1878)	4	3	1478.05	1478.05	Y	Y
Ophiura sp. MoV 7067		60	2	1862.95	4279.15	Y
Ophiuridae incertae sedis
Perlophiura profundissima	Belyaev & Litvinova, 1972	2	2	3464.5	4606.8		Y		Y
ECHINOIDEA
Aspidodiadematidae
Aspidodiadema sp.		1	1	4606.8	4606.8		Y		Y
Plesiodiadema sp.		18	4	3036.9	4090
Cidaridae
Goniocidaris sibogae	Mortensen, 1928	8	3	198.85	1026.65		Y		Y
Clypeasteridae
Clypeaster sp. nov. 1		295	6	189.15	283.2	Y	Y	Y	Y
Echinidae
Echinus multidentatus	H.L. Clark, 1925	5	4	995.55	1402.35		Y		Y
Echinothuriidae
Echinothuriidae sp.		15	5	1020.9	2725.55
Hygrosoma sp. 1		4	1	1862.95	1862.95
Hygrosoma sp.		1	1	1790	1790
Sperosoma sp.		62	9	1331.5	3292.5
Tromikosoma sp.		3	3	2724.9	4684
Loveniidae
Lovenia camarota	H.L. Clark, 1917	2	1	388.1	388.1		Y
Pseudolovenia cf. hirsuta	A. Agassiz & H.L. Clark, 1907	6	2	995.55	1020.9
Macropneustidae
Argopatagus vitreus	A. Agassiz, 1879	4	6	2079	3054
Pedinidae
Caenopedina sp.		8	3	1699.05	2724.9		Y		Y
Phormosomatidae
Phormosoma cf. bursarium	A. Agassiz, 1881	364	3	986.6	1467.65		Y		Y
Phormosomatidae sp.		34	5	985.8	1026.65
Saleniidae
Salenocidaris hastigera	(A. Agassiz, 1879)	94	18	409.85	2839.5		Y		Y
Schizasteridae
Aceste ovata	A. Agassiz & H.L. Clark, 1907	1	1	1007.15	1007.15		Y		Y
Temnopleuridae
Pseudechinus notius	(H.L. Clark, 1916)	7	3	382.6	411.7		Y		Y
HOLOTHUROIDEA
Caudinidae
Paracaudina sp.		1	1	4068.05	4068.05	Y
Deimatidae
Deima validum	Théel, 1879	1	1	2724.9	2724.9		Y		Y
Deima sp.		1	1	4961	4961	Y
Oneirophanta mutabilis	Théel, 1879	1	1	4606.8	4606.8		Y		Y
Orphnurgus sp.		1	1	3883.5	3883.5	Y
Elpidiidae
Ellipinion sp. nov. 1		4	3	1478.05	1552.65	Y
Kolga sp. 1		40	2	986.6	1335.4	Y
Peniagone azorica	v. Marenzeller, 1893	57	3	2724.9	2825.55	Y	Y	Y	Y
Peniagone sp. 2		3	1	4606.8	4606.8	Y
Peniagone sp.		3	1	4684	4684	Y
Holothuriidae
Holothuria austrinabassa	O'Loughlin, Paulay, VandenSpiegel & Samyn, 2007	2	3	283.2	382.6		Y	Y	Y
Laetmogonidae
Laetmogone maculata	(Théel, 1879)	40	2	217.5	411.7		Y	Y	Y
Mesothuriidae
Mesothuria regularia	Heding, 1940	4	1	1526.6	1526.6		Y		Y
Mesothuria sp. 1		43	9	995.55	1335.4	Y
Zygothuria lactea	(Théel, 1886)	14	3	986.6	4090		Y	Y	Y
Molpadiidae
Molpadia sp. 1		1	1	3713.85	3713.85	Y
Molpadia sp. 2		2	2	2725.55	3793.5	Y
Myriotrochidae
Prototrochus roniae	O'Loughlin & MacIntosh, 2015	1	1	1475.3	1475.3	Y	Y		Y
Pelagothuriidae
Enypniastes eximia	Théel, 1882	934	25	986.6	2240.65		Y		Y
Pelagothuriidae sp.		1	1	2253.85	2253.85	Y
Psychropotidae
Benthodytes sanguinolenta	Théel, 1882	7	1	4684	4684	Y	Y
Benthodytes sp. 1		23	6	2724.9	3021.4	Y
Benthodytes sp. 2		34	6	1004.65	4606.8	Y
Psychropotes longicauda	Théel, 1882	2	2	2725.55	4961		Y	Y	Y
Psychropotes sp. 1		5	3	2724.9	3021.4
Synallactidae
Bathyplotes natans	(M. Sars, 1868)	45	6	217.5	3021.4		Y		Y
Molpadiodemas involutus	(Sluiter, 1901)	11	2	1960.9	2724.9		Y		Y
Pseudostichopus hyalegerus	(Sluiter, 1901)	412	6	217.5	411.7		Y	Y	Y
Pseudostichopus mollis	Théel, 1886	11	2	986.6	1020.9		Y		Y
Pseudostichopus sp. 2		1	1	4606.8	4606.8
Synallactes sp.		1	1	1015.05	1015.05
Synaptidae
Protankyra sp. 1		1	1	1862.95	1862.95	Y
ARTHROPODA
CIRRIPEDIA
Calanticidae
Calantica sp. 1		13	3	1607.35	1734.85
Smilium acutum	(Hoek, 1883)	3	2	1380.81	1699.05		Y		Y
Pachylasmatidae
Eutomolasma maclaughlinae	Jones, 2000	30	2	382.6	411.7		Y
Poecilasmatidae
Glyptelasma hamatum	(Calman, 1919)	99	6	995.55	1734.85		Y	Y	Y
Scalpellidae
Amigdoscalpellum costellatum	(Withers, 1935)	10	4	2724.9	3021.4		Y		Y
Amigdoscapellum elegans	(Hoek, 1907)	3	1	4684	4684		Y
Amigdoscalpellum vitreum	(Hoek, 1883)	1	1	1960.9	1960.9		Y
Arcoscalpellum inum	Zevina, 1981	22	7	409.85	1862.95		Y	Y	Y
Arcoscalpellum michelottianum	(Seguenza, 1876)	2	2	1862.95	2748		Y
Arcoscalpellum truncatum	(Hoek, 1883)	11	6	1004.65	2114.2		Y
Catherinum tongum	Zevina, 1981	1	1	3292.5	3292.5
Gymnoscalpellum sp. 1		1	1	2724.9	2724.9
Litoscalpellum sp. nov.		1	1	3793.5	3793.5		Y
Meroscalpellum bifurcatum	(Zevina, 1973)	1	1	4012.65	4012.65
Neoscalpellum cf. schizoplacinum	Newman & Ross, 1971	3	2	4606.8	4961
Neoscalpellum sp. 1		1	1	4606.8	4606.8
Planoscalpellum distinctum	(Hoek, 1883)	1	1	1734.85	1734.85
Planoscalpellum planum	(Hoek, 1883)	15	5	1960.9	3021.4		Y	Y	Y
Trianguloscalpellum regium	(Thomson, 1873)	6	4	2724.9	3793.5		Y	Y	Y
Trianguloscalpellum cf. uniarticulatum	(Nilsson-Cantell, 1921)	32	4	2825.55	4961
Verum australicum	(Hoek, 1883)	37	6	1835.95	3021.4		Y
Verum candidum	(Hoek, 1907)	53	5	382.6	425.65		Y	Y	Y
Verum sp.1		2	1	3292.5	3292.5
Verrucidae
Altiverruca sp. 1		1	1	1862.95	1862.95
Gibbosaverruca nitida	(Hoek, 1883)	2	1	2221.88	2221.88		Y	Y	Y
Gibbosaverruca cf. nitida	(Hoek, 1883)	259	8	1699.05	2725.55
Gibbosaverruca navicula	(Hoek, 1913)	31	5	2003.9	2725.55		Y	Y	Y
Gibbosaverruca sp. 1		24	3	1607.35	1734.85
Metaverruca cf. recta	(Aurivillius, 1898)	7	1	1699.05	1699.05
Metaverruca sp. 1		2	1	1699.05	1699.05	Y
Metaverruca sp.		1	1	3036.9	3036.9
Newmaniverruca cf. digitiformis	Young, 2002	3	1	1375	1375
TANAIDACEA
Unknown family
Tanaidacea sp. 1		8	5	1154.1	2113.1
Tanaidacea sp. 2		9	7	932.4	2777.8
Tanaidacea sp. 3		12	9	996	2777.8
Tanaidacea sp. 4		1	1	1607.35	1607.35
Tanaidacea sp. 5		6	6	996	2168.6
Tanaidacea sp. 6		6	3	1768.7	3734.55
Tanaidacea sp. 7		7	5	995.9	1607.35
Tanaidacea sp. 8		20	7	1154.1	3927
Tanaidacea sp. 9		8	6	932.4	2503
Tanaidacea sp. 10		3	3	989.6	1560.9
Tanaidacea sp. 11		6	4	995.9	4068.05
Tanaidacea sp. 12		3	1	995.9	995.9
Tanaidacea sp. 13		3	3	995.9	996.2
Tanaidacea sp. 14		3	2	2502.93	2524.2
ISOPODA
Aegidae
Aegapheles alozon	(Bruce, 2004)	1	1	357.6	357.6
Aegiochus beri	(Bruce, 1983)	2	2	1478.05	1526.6		Y		Y
Aegiochus cf. bertrandi	Bruce, 2009	1	1	189.15	189.15		Y		Y
Rocinela sp. 1		1	1	382.6	382.6	Y
Antarcturidae
Antarcturus sp. 1		1	1	3021.4	3021.4
Bopyridae
Bathygyge grandis	Hansen, 1897	2	1	2240.65	2240.65		Y		Y
Bopyridae sp.		5	2	217.5	409.85
Cirolanidae
Booralana bathynella	(Bruce, 1981)	3	2	388.1	409.85		Y		Y
Eurydice binda	Bruce, 1986	2	3	138	138	Y	Y	Y	Y
Natatolana cf. matong	Bruce, 1986	7	3	189.15	409.85		Y		Y
Natatolana woodjonesi	(Hale, 1924)	28	3	141	141	Y	Y	Y	Y
Natatolana sp. 1		2	2	1607.35	1862.95	Y
Natatolana sp. MoV 6881		1	1	378.4	378.4	Y
Plakolana sp. MoV 6882		2	1	204.2	204.2	Y
Cymothoidae
Elthusa sp. 1		1	1	382.6	382.6	Y
Dendrotiidae
Dendrotion cf. petrogale		2	1	2524.84	2524.84	Y	Y	Y	Y
Dendrotion sp. 1		1	1	2524.84	2524.84
Dendrotionidae
Dendromunna sp. 1		1	1	995.9	995.9	Y
Desmosomatidae
Chelator sp. 4		2	2	995.9	2694	Y
Chelator sp. MoV 6868		1	1	996.2	996.2	Y
Chelator sp. MoV 6869		13	8	376.3	1560.2	Y
Desmosoma sp. 1		1
Desmosomatidae gen. nov. sp. MoV 6872		2	2	421.4	436.8	Y
Desmosomatidae New Genus A sp. 1		1	1	932.4	932.4	Y
Eugerda sp. 1		1	1	996	996	Y
Eugerda sp. 2		1	1	996.2	996.2	Y
Desmosomatidae Genus B sp. 1		4	2	3282.05	3927	Y
Oecidiobranchus sp. MoV 6871		2	2	376.3	1475.3	Y
Parvochelus sp. 1		1
Torwolia sp. 1		1
Prochelator sp. 1		2	3	995	2524.2	Y
Whoia sp. 1		1	1	2125.8	2125.8	Y
Gnathiidae
Caecognathia sp.		2	1	141	141	Y	Y		Y
Gnathia sp. MoV 5729		1	1	478.2	478.2	Y
Haploniscidae
Haploniscus sp. 2		1	1	2168.6	2168.6	Y
Haploniscus sp. 3		1	1	1560.9	1560.9	Y
Haploniscus sp. MoV 6874		1	1	1490	1490	Y
Haploniscus sp. MoV 6875		10	3	932.4	2018.2	Y
Hyssuridae
Kupellonura cf. currawan	Poore & Lew Ton, 1988	1	1	996	996		Y		Y
Ischnomesidae
Contrarimesus sp. 1		1	1	2011.9	2011.9	Y
Ischnomesus sp. 1		1	1	932.4	932.4	Y
Ischnomesus sp. 2		2	2	1171.7	3282.05	Y
Ischnomesus sp. 3		1	1	4068.05	4068.05	Y
Ischnomesus sp. 4		1	1	2993.7	2993.7	Y
Ischnomesus sp. MoV 6876		1	1	983.1	983.1	Y
Katianiridae
Katianiridae New genus sp. 1		1	1	995.9	995.9	Y
Leptanthuridae
Leptanthura sp. 1		1	1	996.2	996.2	Y
Leptanthura sp. 2		1	1	995.9	995.9	Y
Macrostylidae
Macrostylidae New Genus A sp. 1		1	1	1171.7	1171.7	Y
Macrostylis sp. MoV 6873		3	1	2003	2003	Y
Munnopsidae
Disconectes sp. MoV 6877		1	1	1013.6	1013.6	Y
Ilyarachna sp. 1		2	1	995.9	995.9	Y
Munneurycope sp. 1		1	1	996.2	996.2	Y
Nyctobadistes sp. 1		5	1	995.9	995.9	Y
Nannoniscidae
Exiliniscus sp. 1		1	1			Y
Thaumastosoma sp. 1		1
Paramunnidae
Pentaceration lancifera	Just, 2011	2	2	1255.5	1320.7		Y	Y	Y
Serolidae
Brucerolis victoriensis	Storey & Poore, 2009	446	20	1492.15	3021.4	Y	Y	Y	Y
Sphaeromatidae
Cercosphaera sp. 1		1	1	189.15	189.15	Y
Cilicaeopsis sp. 1		3	2	189.15	198.85	Y
Cilicaeopsis sp. 2		1	1	409.85	409.85	Y
Thambematidae
Microthambema sp. 1		2	2	932.4	3927	Y
Microthambema sp. MoV 6878		3	3	482.5	2003	Y
Microthambema sp. MoV 6879		2	2	212.4	378.4	Y
Microthambema sp. MoV 6880		1	1	1013.6	1013.6	Y
AMPHIPODA
Adeliellidae
Adeliella sp.		66				Y
Amaryllididae
cf. Bamarooka sp. 1		1	1	235.9	235.9
Ampeliscidae
Ampelisca sp. 1		1	1	212.4	212.4
Ampelisca sp. MoV 6894		1	1	378.4	378.4	Y
Ampelisca sp.		2	3	141	141	Y
Aristiidae
Aristias sp.		2				Y
Calliopiidae
Harpinioides cf. drepanocheir	Stebbing, 1888	4	1	212.4	212.4
Caprellidae
Caprellidae sp.		6	5	189.3	2241.5
Corophiidae
Corophiidae sp.		1	1	995.9	995.9
Cyphocarididae
Cyphocaris sp.		1	1	1862.95	1862.95
Cyproideidae
Austropheonoides sp. 1		1	1	235.9	235.9
Eupronoidae
Parapronoe sp.		2	1	1656.41	1656.41	Y
Eurytheneidae
Eurythenes gryllus	(Lichtenstein in Mandt, 1822)	1	1	4606.8	4606.8
Eurythenes thurstoni	Stoddart & Lowry, 2004	1	1	1015.05	1015.05
Eusiridae
Rhachotropsis sp. MoV 6884		1	1	212.4	212.4	Y
Eusiridae sp.		1	1	2507.71	2507.71	Y
Hyperiopsidae
Hyperiopsis sp. 1		1	1	189.3	189.3
Ischyroceridae
Cerapus? sp. 1		2	1	378.4	378.4
Ischyroceridae sp.		1	1	996.2	996.2
Ischyroceridae sp. 1		4	3	189.3	212.4
Ischyrocerus sp. MoV 6885		5	3	189.3	235.9	Y
Myersius sp. MoV 6886		1	1	378.4	378.4	Y
Pseudericthonius sp. MoV 6887		8	5	482.5	1995.4	Y
Pseudischyrocerus sp. MoV 6888		2	1	235.9	235.9	Y
Kamakidae
cf. Aorcho sp. 1		2	2	378.4	421.4
Kamakidae?
Kamakidae? sp. 1		1	1	2014.2	2014.2
Leucothoidae
Anamixis sp. 1		10	3	189.3	983.1
Leucothoidae sp. 1		1	1	189.3	189.3
Lysianassidae
Cheirimedon sp.		1	1	4012.65	4012.65
Lysianassoidea Unident.
Lysianassoidea sp. 1		1	1	996.2	996.2
Lysianassoidea sp. 2		1	1	203.2	203.2
Lysianassoidea sp. 3		2	1	376.3	376.3
Maeridae
Linguimaera sp. 1		1	1	235.9	235.9
Maeridae sp. 1		2	1	235.9	235.9
Maeridae sp. 2		2	1	235.9	235.9
Maeridae sp. 3		2	1	204.2	204.2
Maxillipiidae?
Maxillipiidae? sp. 1		1	1	482.5	482.5
Oedicerotidae
Oedicerotidae sp. 1		1	1	204.2	204.2
Oedicerotidae sp. 2		1	1	382.9	382.9
Phoxocephalidae
Cephalophoxoides sp.		2	1	189.3	189.3
Cephalophoxoides sp. MoV 6175		8	4	189.3	436.8	Y	Y		Y
Cephalophoxoides sp. MoV 6889		1	1	983.1	983.1	Y
Harpiniopsis sp. MoV 6890		1	1	1013.6	1013.6	Y
Paraphoxus? sp. 1		2	1	235.9	235.9
Phoxocephalidae sp.		2	2	212.4	996.2
Pseudharpinia sp. MoV 6164		1	1	1013.6	1013.6	Y	Y		Y
Podoceridae
Podoceridae sp. 1		2	1	212.4	212.4
Stegocephalidae
Stegocephalidae sp.		8	1	4090	4090	Y
Stenothoidae
Stenothoidae sp. 1		1	1	189.3	189.3
Stenothoe sp.		3	1	1653.38	1653.38
Synopiidae
Pseudotiron sp. MoV 6891		2	2	376.3	436.8	Y
Syrrhoe sp. MoV 6892		1	1	376.3	376.3	Y
Trischizostomatidae
Trischizostoma sp.		2	2	1335.4	1862.95
Zobrachoidae
Zobracho sp. MoV 6893		3	3	995.9	1995.4	Y
LOPHOGASTRIDA
Gnathophausiidae
Gnathophausia ingens	(Dohrn, 1870)	6	6	1006.4	2240.65		Y	Y	Y
Gnathophausia zoea	Willemoes-Suhm, 1873	8	5	1021.4	1862.95		Y		Y
DECAPODA
Acanthephyridae
Acanthephyra acutifrons	Spence Bate, 1888	2	2	2724.9	3464.5		Y		Y
Acanthephyra quadrispinosa	Kemp, 1939	8	7	995.55	3883.5		Y		Y
Acanthephyra sica	Spence Bate, 1888	11	8	1526.6	4606.8		Y		Y
Acanthephyra sp.		2	2	1004.65	2003.9		Y		Y
Heterogenys microphthalma	(Smith, 1885)	2	2	2240.65	3292.5
Hymenodora gracilis	Smith, 1886	2	2	2724.9	3464.5		Y		Y
Aristeidae
Aristeus mabahissae	Ramadan, 1938	101	3	1015.05	1027.2		Y		Y
Austropenaeus nitidus	(Barnard, 1947)	227	13	986.6	1552.65		Y	Y	Y
Hemipenaeus cf. spinidorsalis		1	1	3883.5	3883.5
Atelecyclidae
Trichopeltarion sp. MoV 5135		6	4	357.6	411.7	Y
Axiidae
Eiconaxius sp. MoV 5662		3	2	204.2	436.8	Y
Benthesicymidae
Benthesicymus howensis	Dall, 2001	39	10	2079.1	3883.5		Y		Y
Benthesicymus investigatoris	Alcock & Anderson, 1899	4	3	995.55	1020.9		Y		Y
Gennadas gilchristi	Calman, 1925	15	11	1004.65	3683.7		Y	Y	Y
Gennadas kempi	Stebbing, 1914	3	3	1552.65	2079.1		Y	Y	Y
Chirostylidae
Gastroptychus cf. brevipropodus nov.		6	4	189.15	221.35	Y
Uroptychus flindersi	Ahyong & Poore, 2004	2	2	409.85	411.7		Y	Y	Y
Crangonidae
Aegaeon lacazei	(Gourret, 1887)	9	3	189.15	217.5		Y	Y	Y
Lissosabinea lynseyae	Taylor & Collins, 2009	2	2	198.85	388.1		Y		Y
Parapontophilus cf. difficilis	Komai, 2008	179	27	388.1	4090	Y
Cyclodorippidae
Tymolus similis	(Grant, 1905)	174	6	217.5	411.7		Y	Y	Y
Cymonomidae
Cymonomus cf. soela		3	3	986.6	1020.9	Y
Cymonomus cf. umitake nov.		1	1	388.1	388.1	Y
Cymonomus delli	Griffin & Brown, 1975	11	3	382.6	425.65		Y		Y
Cymonomus soela	Ahyong & Brown, 2003	2	1	995.55	995.55		Y		Y
Diogenidae
Dardanus arrosor	(Herbst, 1796)	9	4	189.15	283.2		Y	Y	Y
Paguristes aciculus	Grant, 1905	64	8	189.15	411.7		Y	Y	Y
Strigopagurus elongatus	Forest, 1995	1	1	283.2	283.2		Y	Y	Y
Dromiidae
Austrodromidia incisa	(Henderson, 1888)	6	2	189.15	217.5		Y		Y
Austrodromidia insignis	(Rathbun, 1923)	17	3	189.15	217.5		Y	Y	Y
Austrodromidia octodentata	(Haswell, 1882)	1	1	208.7	208.7		Y	Y	Y
Stimdromia lateralis	(Gray, 1831)	7	4	189.15	221.35		Y	Y	Y
Epialtidae
Rochinia mosaica	(Whitelegge, 1900)	4	1	189.15	189.15		Y	Y	Y
Geryonidae
Chaceon albus	Davie, Ng & Dawson, 2007	6	4	1026.65	1843		Y		Y
Glyphocrangonidae
Glyphocrangon cf. ferox sp.nov.		42	4	2079.1	2725.55	Y
Glyphocrangon cf. fimbriata sp. nov.		22	8	1492.15	2825.55	Y
Glyphocrangon dimorpha	Komai, 2004	15	4	1960.9	2037.2		Y
Glyphocrangon elephas	Komai, 2005	16	2	411.7	425.65		Y	Y	Y
Goneplacidae
Pycnoplax meridionalis	(Rathbun, 1923)	4	2	198.85	212.4		Y	Y	Y
Pycnoplax victoriensis	(Rathbun, 1923)	14	5	217.5	425.65		Y	Y	Y
Hippolytidae
Leontocaris bulga		1	1	1365	1365
Inachidae
Cyrtomaia maccullochi	Rathbun, 1918	25	4	382.6	411.7		Y	Y	Y
Dorhynchus ramusculus	(Baker, 1906)	109	9	189.15	1026.65		Y	Y	Y
Platymaia wyvillethomsoni	Miers, 1885	42	7	189.15	425.65		Y	Y	Y
Latreilliidae
Eplumula australiensis	(Henderson, 1888)	2	2	189.15	208.7		Y	Y	Y
Leucosiidae
Ebalia tuberculosa	(A. Milne-Edwards, 1873)	89	11	189.15	425.65		Y	Y	Y
Merocryptus lambriformis	A. Milne-Edwards, 1873	7	3	198.85	283.2		Y	Y	Y
Lithodidae
Neolithodes flindersi	Ahyong, 2010	7	5	986.6	1331.5		Y	Y	Y
Majidae
Choniognathus granulosus	(Baker, 1906)	3	2	189.15	198.85		Y	Y	Y
Leptomithrax globifer	Rathbun, 1918	5	3	189.15	208.7		Y	Y	Y
Prismatopus spatulifer	(Haswell, 1881)	9	3	189.15	217.5		Y	Y	Y
Teratomaia richardsoni	(Dell, 1960)	1	1	425.65	425.65		Y		Y
Munididae
Munida cf. manqingae sp. nov.		1	1	1779.1	1779.1	Y
Munida endeavourae	Ahyong & Poore, 2004	4	2	989.6	1007.15		Y		Y
Munida haswelli	Henderson, 1885	1	1	198.85	198.85		Y	Y	Y
Munida sp. mov 5661		1	1	204.2	204.2	Y
Munidopsidae
Galacantha rostrata	A. Milne Edwards, 1880	29	11	1790	2825.55		Y		Y
Munidopsis arietina	Alcock & Anderson, 1894	4	4	1835.95	2079.1
Munidopsis cf. edwardsi sp. nov.		1	1	4961	4961	Y
Munidopsis cf. granosa sp. nov.		6	5	3713.85	4684	Y
Munidopsis cf. subsquamosa sp. nov.		2	2	2725.55	3061	Y
Munidopsis crenatirostris	Baba, 1988	1	1	382.6	382.6		Y		Y
Nematocarcinidae
Nematocarcinus productus	Spence Bate, 1888	172	32	995.55	3292.5		Y		Y
Nematocarcinus sigmoideus	Macpherson, 1984	62	11	1015.05	4961		Y		Y
Nematocarcinus sp.		4	1	986.6	986.6
Nephropidae
Metanephrops velutinus	Chan & Yu, 1991	1	1	411.7	411.7		Y	Y	Y
Nephropsis acanthura	Macpherson, 1990	2	2	986.6	995.55		Y	Y	Y
Nephropsis suhmi	Spence Bate, 1888	5	4	986.6	1552.65		Y	Y	Y
Oplophoridae
Oplophorus novaezeelandiae	(de Man, 1931)	1	1	2114.2	2114.2		Y	Y	Y
Systellaspis debilis	(A.Milne-Edwards, 1881)	4	4	1862.95	4606.8		Y		Y
Paguridae
Bythiopagurus macrocolus		2	2	1380.81	1380.81
Goreopagurus poorei	Lemaitre & McLaughlin, 2003	1	1	1020.9	1020.9		Y		Y
Lophopagurus nanus	(Henderson, 1888)	4	3	208.7	283.2		Y	Y	Y
Pagurodes inarmatus	Henderson, 1888	68	17	1331.5	2114.2		Y	Y	Y
Propagurus haigae	(McLaughlin, 1997)	4	2	411.7	425.65		Y		Y
Palicidae
Pseudopalicus macromeles	Castro, 2000	31	4	189.15	283.2		Y	Y	Y
Pandalidae
Chlorotocus novaezealandiae	(Borradaile, 1916)	50	3	189.15	217.5		Y	Y	Y
Plesionika cf. macropoda sp. nov.		16	1	400	400	Y
Plesionika edwardsii	(Brandt, 1851)	14	2	198.85	208.7		Y		Y
Plesionika martia	(A. Milne-Edwards, 1883)	10	1	388.1	388.1		Y	Y	Y
Plesionika semilaevis	Spence Bate, 1888	1	1	1020.9	1020.9		Y		Y
Parapaguridae
Oncopagurus sp. nov. 1		100	7	995.55	1026.65	Y
Parapagurus bouvieri	Stebbing, 1910	10	4	409.85	2014		Y	Y	Y
Parapagurus furici	Lemaitre, 1999	63	7	1335.4	3021.4
Parapagurus latimanus	Henderson, 1888	350	15	986.6	3021.4		Y	Y	Y
Parapagurus richeri	Lemaitre, 1999	251	26	995.55	3464.5		Y		Y
Pasiphaeidae
Leptochela sydniensis	Dakin & Colefax, 1940	1	1	212.4	212.4		Y	Y	Y
Parapasiphae sulcatifrons	Smith, 1884	3	3	995.55	2014		Y		Y
Pasiphaea barnardi	Yaldwyn, 1971	4	1	1021.4	1021.4		Y		Y
Pasiphaea cf. longitaenia sp. nov.		3	2	1007.15	1027.2	Y
Pasiphaea cf. oshoroae sp. nov.		3	2	2037.2	2240.65	Y
Pasiphaeidae sp.		1	1	1027.2	1027.2
Polychelidae
Pentacheles laevis	Bate, 1878	1	1	1021.4	1021.4		Y	Y	Y
Pentacheles validus	A. Milne-Edwards, 1880	7	7	1335.4	1960.9		Y	Y	Y
Stereomastis surda	(Galil, 2000)	1	1	1026.65	1026.65		Y		Y
Willemoesia pacifica	Sund, 1920	95	11	2724.9	4090		Y	Y	Y
Scyllaridae
Antarctus mawsoni	(Bage, 1938)	7	4	198.85	409.85		Y	Y	Y
Ibacus alticrenatus	Spence Bate, 1888	29	8	189.15	425.65		Y	Y	Y
Scyllaridae sp.		1	1	3000	3000
Sergestidae
Allosergestes sargassi	(Ortmann, 1893)	2	1	2037.2	2037.2		Y	Y	Y
Deosergestes corniculum	(Krøyer, 1855)	1	1	995.55	995.55		Y		Y
Deosergestes disjunctus	(Burkenroad, 1940)	5	3	995.55	1478.05		Y	Y	Y
Deosergestes sp.		3	3	986.6	2240.65
Parasergestes armatus	(Krøyer, 1855)	1	1	2240.65	2240.65		Y		Y
Petalidium foliaceum	Spence Bate, 1881	2	2	2114.2	3464.5		Y	Y	Y
Phorcosergia potens		4	3	1006.4	2079.1		Y	Y	Y
Prehensilosergia prehensilis	Spence Bate, 1881	2	2	986.6	2725.55		Y	Y	Y
Sergestes arcticus		1	1	1843	1843		Y	Y	Y
Sergestidae sp.	Dana, 1852	2	1	1862.95	1862.95
Sicyoniidae
Sicyonia australiensis	Hanamura & Wadley, 1998	1	1	198.85	198.85		Y		Y
Thoridae
Eualus sp. nov. 1		1	1	986.6	986.6	Y
Eualus sp. nov. 2		2	2	986.6	989.6	Y
Lebbeus clarehannah	McCallum & Poore, 2010	1	1	411.7	411.7		Y		Y
Lebbeus sp. nov. 1		2	2	1015.05	1843	Y
STOMATOPODA
Squillidae
Anchisquilloides mcneilli	(Stephenson, 1953)	15	4	189.15	1026.65		Y	Y	Y
?Hemisqullidae
Gonodactyloidea sp.		1	1	3000	3000
PYCNOGONIDA
Ammotheidae
Chonothea sp. nov. 1		1	1	189.15	189.15	Y
Callipallenidae
Callipallene sp. MoV 6883		1	1	212.4	212.4	Y
Meridionale sp. nov. 1		1	1	189.15	189.15	Y
Parapallene sp. nov. 1		1	1	189.15	189.15	Y
Colossendeidae
Colossendeis colossea	Wilson, 1881	1	1	1335.4	1335.4		Y		Y
Colossendeis cucurbita	Cole, 1909	59	15	1006.4	3057.45		Y		Y
Colossendeis macerrima	Wilson, 1881	11	4	1835.95	2014		Y	Y	Y
Colossendeis minor	Schimkewitsch, 1893.	45	17	138	4090		Y		Y
Colossendeis sp. nov.		1	1	1467.65	1467.65	Y
Colossendeis spicula	Child, 1994	7	3	1934.05	2014		Y		Y
Colossendeis tasmanica	Staples, 2007	11	5	1934.05	2079.1		Y		Y
Pallenopsidae
Bathypallenopsis antipoda	(Clark, 1972)	1	1	283.2	283.2
Bathypallenopsis californica	Schimkewitsch, 1893	1	1	1790	1790
Pallenopsis gippslandiae	Stock, 1954	1	1	283.2	283.2		Y		Y
